# Supplementary material for: Acidic metal–organic framework empowered precise hydrodeoxygenation of bio-based furan compounds and cyclic ethers for sustainable fuels
Source: Royal Society of Chemistry journal article supplement (doi:10.1039/d1gc03055h), 2021-01-01
Supplement: d1gc03055h1.pdf [file d1gc03055h1.pdf]

## SUPPORTING INFORMATION

Electronic Supplementary Information (ESI) for Green Chemistry  
This journal is © The Royal Society of Chemistry 2021

### Acidic Metal–Organic Framework Empowered Precise Hydrodeoxygenation of Bio-based Platform Molecules for Sustainable Fuels

Dong-Huang Liu<sup>†[a]</sup>, Hai-Long He<sup>†[a]</sup>, Jun-Jie Wang<sup>[a]</sup>, Si-Yu Zhou<sup>[a]</sup>, Tengwu Zeng<sup>[a]</sup>, Xiang-Yu Gao<sup>[a]</sup>, Yao Xiao<sup>[b]</sup>,  
Xianfeng Yi<sup>[b]</sup>, Anmin Zheng<sup>[b]</sup>, Yue-Biao Zhang<sup>\*,[a]</sup>, and Zhi Li<sup>\*,[a]</sup>

<sup>a.</sup> School of Physical Science and Technology, ShanghaiTech University, Shanghai 201210 (China). E-mail:  
lizhi@shanghaitech.edu.cn (Z. Li); zhangyb@shanghaitech.edu.cn (Y. Zhang)

<sup>b.</sup> State Key Laboratory of Magnetic Resonance and Atomic and Molecular Physics, National Center for Magnetic  
Resonance in Wuhan, Key Laboratory of Magnetic Resonance in Biological Systems, Wuhan Institute of Physics and  
Mathematics, Chinese Academy of Sciences, Wuhan 430071, P. R. (China)

† These authors contributed equally to this work.

## Table of Contents

### Experimental Procedures

#### 1. Materials and synthesis

##### 1.1 Materials.

##### 1.2 Synthesis of MIL-101-SO<sub>3</sub>H.

##### 1.3 Synthesis of MIL-101.

##### 1.4 Synthesis of UiO-66-SO<sub>3</sub>H.

#### 2. Instrumentation and characterization.

##### 2.1 Instrumentation.

##### 2.2 Determination Adsorption Affinity of solid acid.

##### 2.3 Acidity Characterization by <sup>31</sup>P Solid-State NMR.

##### 2.4 Supplementary characterization of materials

##### 2.5 Static vapor adsorption

##### 2.6 TGA-FTIR.

##### 2.7 ADS-CAL

#### 3. Synthesis of fuel precursors

#### 4. PHDO reactions.

#### 5. NMR spectra of fuel precursors and designer fuels

#### 6. References

#### Author Contributions

## Experimental Procedures

### 1. Materials and synthesis

#### 1.1 Materials.

Chromium (VI) oxide (CrO<sub>3</sub>) (99%) was purchased from Alfa Aesar; Zirconium (IV) chloride (ZrCl<sub>4</sub>) (≥99.9%), Chromium (III) nitrate nonahydrate [Cr(NO<sub>3</sub>)<sub>3</sub>·9H<sub>2</sub>O] (99.95%), *p*-Phthalic acid (H<sub>2</sub>BDC) (99%) were purchased from Aladdin; Monosodium 2-sulfoterephthalate (H<sub>2</sub>BDC-SO<sub>3</sub>Na) (>98%) was purchased from TCI; N,N-Dimethylformamide (DMF) (≥99.5%), acetic acid (AcOH) (≥99.5%), hydrochloric acid (HCl, ab. 36.5 wt %, 12 mol/L) (AR) were purchased from General-Reagent; Methanol anhydrous (MeOH) (AR), hydrofluoric acid (HF, ≥ 40 wt %) (GR) were obtained from Sinopharm Chemical Reagent Co., Ltd.; 1,3,5-Trichlorobenzene (99%) was purchased from Adamas. All the materials were used as received without further purification.

Anhydrous grade substrates were obtained from commercial vendors and used as received unless otherwise noted. Anhydrous THF and CH<sub>2</sub>Cl<sub>2</sub> were obtained from commercial vendors and stored in JC Meyer Phoenix Solvent Drying System. Amberlyst-15 were pretreat by deionized water and EtOH. 1,4-Cineole, γ-terpinene, 1,1,2,2-tetrachloroethane, *n*-undecane (*n*-C<sub>11</sub>H<sub>24</sub>), Montmorillonite (K10), Nafion, HZSM-5, H<sub>4</sub>SiMo<sub>12</sub>O<sub>40</sub>, Pd(acac)<sub>2</sub>, Pd/C (5% on activated carbon), Pd/C (10% on activated carbon), Pt/C (5% on activated carbon), Rh/C (5% on activated carbon), Ru/C (5% on activated carbon) and Raney Ni were obtained from commercial vendors and used as received.

All manipulations of reagents were carried out with oven-dried reaction vessels unless otherwise noted. Reactions under N<sub>2</sub> atmosphere were carried out in cylindrical reactors equipped with rubber septa, a magnetic stirbar, and N<sub>2</sub> balloon, with heating supplied by an oil bath or a heating block. Flash column chromatography was done on Biotage Isolera One using mixtures of petroleum ether (PE) and ethyl acetate (EA) as eluents.

All the hydrodeoxygenation and hydrogenation reactions were performed in zirconium alloy high pressure reactors purchased from Anhui Kemi Machinery Technology Co., LTD.

## 1.2 Synthesis of MIL-101-SO<sub>3</sub>H.

The acidic MOF, MIL-101-SO<sub>3</sub>H, was synthesized according to the literature and modified slightly for better crystallinity.<sup>[1]</sup> H<sub>2</sub>BDC-SO<sub>3</sub>Na (2.5 mmol, 0.6704 g) was dissolved in 8 mL DI water, and CrO<sub>3</sub> (2.5 mmol, 0.2498 g) was dissolved in 2 mL deionized (DI) water. Both solutions were filtered through Nylon syringe filters (0.45 μm) into a 20 mL vial, in which 0.16 mL concentrated HCl was added. The resulting mixture was filtered again into a 20 mL Teflon-lined autoclave, and heated at 180 °C in an oven for 6 days. The oven was then cooled down to 120 °C, and the autoclave was taken out of the oven and cooled to room temperature (RT). The resulting green powder was centrifuged with DI water (20 mL × 6), mixed solvent (MeOH:H<sub>2</sub>O = 1:2, v/v<sup>1</sup>, 20 mL × 3), and dried in vacuum. The crude MIL-101-SO<sub>3</sub>H was further purified and acidified by the following washing-centrifuging cycles: (1) in 150 mL DMF at 120 °C for 24 h, then centrifuged with the abovementioned mixed solvent (20 mL × 3); (2) in 150 mL mixed solvent at 90 °C for 12 h, then centrifuged with the mixed solvent (20 mL × 3); (3) in 150 mL mixed solvent containing 1 mL concentrated HCl at RT overnight with stirring, then centrifuged with the mixed solvent (20 mL × 3); (4) in 150 mL mixed solvent at 90 °C for 6 h, then centrifuged with the mixed solvent (20 mL × 3). The resulting powder was dried in vacuum and activated at 120 °C under vacuum for 24 h. Elemental analysis (EA) of the activated sample: Calcd. for Cr<sub>3</sub>O(C<sub>8</sub>H<sub>3</sub>O<sub>4</sub>SO<sub>3</sub>)<sub>2</sub> (C<sub>8</sub>H<sub>3</sub>O<sub>4</sub>SO<sub>3</sub>H)<sub>2</sub>: Cr, 17.3%; C, 31.9%; O, 39%; S, 10.6%; H, 1.2%. Found: Cr, 20.3%; C, 30.0%; O, 35.0%; S, 8.74%; H, 0.98%. Meanwhile, X-ray photoelectron spectroscopy (XPS) results of the spent sample after TGA (800 °C, 0.5 h) showed obvious sulphur signal (about 15% sulphur had remained in the sample), which may explain the lower S content of the EA results than the calculated value. The combined EA and XPS results suggest that the activated MIL-101-SO<sub>3</sub>H may contain one equivalent of H<sub>2</sub>O and likely some ligand defects. Therefore, the exact chemical formula of the prepared MIL-101-SO<sub>3</sub>H could be (Cr<sub>3</sub>O)<sub>1.2</sub>(C<sub>8</sub>H<sub>3</sub>O<sub>4</sub>SO<sub>3</sub>)<sub>2.64</sub>(C<sub>8</sub>H<sub>3</sub>O<sub>4</sub>SO<sub>3</sub>H)<sub>0.24</sub>·H<sub>2</sub>O.

## 1.3 Synthesis of MIL-101.

Synthesis of MIL-101 was performed following modified procedures from a previous report.<sup>[2]</sup> Cr(NO<sub>3</sub>)<sub>3</sub>·9H<sub>2</sub>O (0.4002 g, 1 mmol), H<sub>2</sub>BDC (0.1661 g, 1 mmol), HF (40 wt %, 23 μL, 0.5 mmol) and 4.8 mL DI water were merged in a Teflon-lined autoclave and heated at 220 °C in an oven for 8 h. The as-synthesized product was centrifuged and the solid collected as a green powder, which was then dispersed in 20 mL DI water. The mixture was allowed to stand for 3 min, and the supernatant suspension was quickly decanted to another centrifuge tube in order to remove impurities as a gray precipitate. The resulting suspension was centrifuged and the dispersion-standing-decanting operations were repeated for 3 times or until no gray precipitate appears any more. The product was further purified by washing-centrifuging sequentially in 100 mL DI water at 70 °C for 5 h, 100 mL ethanol at 60 °C for 3 h, and 150 mL 30 mM NH<sub>4</sub>F aqueous solution at 60 °C for 10 h. Finally, the MIL-101 was centrifuged with 200 mL hot DI water at 60 °C for 6 times and dried at room temperature in vacuum and activated at 120 °C under vacuum for 24 h.

## 1.4 Synthesis of UiO-66-SO<sub>3</sub>H.

Synthesis of UiO-66-SO<sub>3</sub>H was performed following modified procedures from a previous report.<sup>[3]</sup> ZrCl<sub>4</sub> (53 mg, 0.2274 mmol), H<sub>2</sub>BDC (28.3 mg, 0.1703 mmol), and H<sub>2</sub>BDC-SO<sub>3</sub>Na (15.2 mg, 0.0568 mmol) were merged in a 20 mL vial, then the mixture was dissolved in 10 mL mixed solvent (DMF:AcOH = 9:1, v/v<sup>1</sup>) and heated at 120 °C in an oven for 40 h. The as-synthesized UiO-66-SO<sub>3</sub>H was centrifuged with DMF for 3 times. The product was further purified by washing the UiO-66-SO<sub>3</sub>H in 20 mL DMF for 8 hours for 3 times, and then in 20 mL MeOH 8 hours for 3 times. Finally, the UiO-66-SO<sub>3</sub>H was dried at room temperature in vacuum and activated at 120 °C under vacuum for 6 h. XPS results indicate this UiO-66-SO<sub>3</sub>H contains about 25% BDC-SO<sub>3</sub>H ligand as UiO-66-SO<sub>3</sub>H-25%.

## 2. Instrumentation and characterization.

### 2.1 Instrumentation.

The purity and crystallinity of samples were characterized by a powder X-ray diffractometer (PXRD, Bruker, D8 Advance) with Cu K $\alpha$  radiation ( $\lambda = 1.5418 \text{ \AA}$ ). Morphology and crystal size of samples were characterized by scanning electron microscope (SEM, JEOL, JSM-7800F Prime). Pore size distribution and pore volume of samples were characterized on a microporosity and specific surface area analyzer (ADS, MicrotracBEL, Belsorp-MAXII). Element content was characterized by X-ray photoelectron spectroscopy (XPS, Thermo Scientific, Escalab 250Xi), element analyzer [EA, PerkinElmer, SERIES II 2400(Clarus 580)] and inductively coupled plasma optical emission spectrometer (ICP-OES, Thermo Scientific, ICP-OES Icap7400). Static organic vapor adsorption measurement were measured on a precision vapor adsorption measuring system (BELSORP, Aqua3), 2,5-dimethyltetrahydrofuran (2,5-DMTHF, TCI, > 98%), 2-hexanol (Macklin, 98%), 1,5-hexadiene (Macklin, 97%), *n*-hexane (General-Reagent,  $\geq 97.0\%$ ), ultrahigh-purity (> 99.999%) N<sub>2</sub>, and He in compressed gas cylinders were used through all experiments. Thermostability was characterized by thermogravimetric analyzer (TGA, PerkinElmer, TGA 4000) with a heating rate of  $5 \text{ }^{\circ}\text{C}\cdot\text{min}^{-1}$  from  $30 \text{ }^{\circ}\text{C}$  to  $800 \text{ }^{\circ}\text{C}$  under N<sub>2</sub> flow. Thermogravimetric analyzer-Fourier transform infrared joint instrument used PerkinElmer TGA 8000 and PerkinElmer FT-IR Spectrometer Frontier (TGA-FTIR). Organic vapor adsorption-calorimetric joint instrument used MicrotracBEL Belsorp-MAXII and KEP ChemStar (ADS-CAL). NMR spectra were recorded on a Bruker Avance III HD spectrometer (FT, 500 MHz for  $^1\text{H}$ , 126 MHz for  $^{13}\text{C}$ ). Chemical shifts ( $\delta$ ) for  $^1\text{H}$ , and  $^{13}\text{C}$  are referenced to internal solvent. Signal patterns are indicated as s, singlet; d, doublet; t, triplet; q, quartet; and m, multiplet. High-resolution mass spectra (HRMS) were obtained from a ThermoFisher Q-Exactive Focus LC/MS spectrometer in electrospray ionization (ESI+) mode. Gas Chromatography-Mass Spectrometry (GCMS) were obtained from a ThermoFisher Trace ISQ LT GC/MS spectrometer in electron ionization (EI) mode. Gas Chromatography quantification of products were performed on an Agilent 7890B GC System equipped with auto sampler and FID detector.

### 2.2 Determination Ether Adsorption Selectivity (EAS) of solid acid.

0.9:1.1:38 v/v 2,5-DMTHF/1,5-hexadiene/cyclohexane ternary mixture was prepared as a stock solution containing about equimolar of 2,5-DMTHF and 1,5-hexadiene, and their exact molar proportion was evaluated with  $^1\text{H}$  NMR. For each solid acid, about 40 mg powder was mixed with 1 mL stock solution, and the mixture was agitated on a vortex mixer for 1 minute and let stand for 15 minutes. The mixture was centrifuged and the solid collected as the adsorbate-loaded solid acid. Then, the loaded solid acid was washed with 500  $\mu\text{L}$  CDCl<sub>3</sub> and centrifuged, and the supernatant collected. The solid was further washed with portions of 500  $\mu\text{L}$  DMSO-*d*<sub>6</sub> and CDCl<sub>3</sub> until  $^1\text{H}$ -NMR showed no presence of desorbed adsorbate in the supernatant. To the combined supernatant was added 500  $\mu\text{L}$  internal standard solution of 1,3,5-Trichlorobenzene in DMSO-*d*<sub>6</sub> (24.95 mg 1,3,5-Trichlorobenzene in 5.00 mL DMSO-*d*<sub>6</sub>). EAS of solid acids can be determined from the ratio of desorbed 2,5-DMTHF to 1,5-hexadiene by taking  $^1\text{H}$ -NMR of the combined supernatant solutions versus the initial ratio in the stock solution. The total adsorption capacity of 2,5-DMTHF (or 1,5-hexadiene) was calibrated by 1,3,5-Trichlorobenzene as the internal standard.

### 2.3 Acidity Characterization by $^{31}\text{P}$ Solid-State NMR.

**Sample preparation.** Prior to the adsorption of probe molecules, MIL-101-SO<sub>3</sub>H were placed in glass tubes and connected to vacuum for dehydration. The  $120 \text{ }^{\circ}\text{C}$  dehydration protocol is consisted of heating the tube under vacuum at a rate of  $1 \text{ }^{\circ}\text{C min}^{-1}$  to  $120 \text{ }^{\circ}\text{C}$ , and then keeping the temperature at  $120 \text{ }^{\circ}\text{C}$  and the pressure below  $10^{-3} \text{ Pa}$  for 12 h. The  $20 \text{ }^{\circ}\text{C}$  dehydration protocol puts the sample under vacuum at ambient temperature (about  $20 \text{ }^{\circ}\text{C}$ ) for 2 h.

One  $20 \text{ }^{\circ}\text{C}$ -dehydrated and one  $120 \text{ }^{\circ}\text{C}$ -dehydrated samples were applied a sufficient amount of the probe molecule trimethylphosphine (TMP) in a liquid N<sub>2</sub> bath. After the adsorption was equilibrated, the physisorbed TMP in these samples was removed by vacuum at room temperature for 30 minutes. Another  $120 \text{ }^{\circ}\text{C}$ -dehydrated sample was applied trimethylphosphine oxide (TMPO) according to the method proposed in our previous work.<sup>[4,5]</sup> All the sample tubes were then flame sealed. Prior to the NMR experiments,

all the sealed sample tubes were opened and the samples were transferred into  $\text{ZrO}_2$  rotors with Kel-F end caps under a dry nitrogen atmosphere in a glovebox. After the NMR experiments, the TMPO-loaded sample was exposed in air for additional 2 h and tested again.

**NMR setup.** All the solid-state NMR experiments were performed on a Bruker Ascend-500 MHz spectrometer at Larmor frequencies of 500.57 and 202.63 MHz for  $^1\text{H}$  and  $^{31}\text{P}$  nucleus, respectively, with a 4 mm magic-angle-spinning (MAS) probe operating at a spinning rate of 10 kHz or 12 kHz (only for the 20 °C-dehydrated TMP-loaded sample).  $^{31}\text{P}$  MAS NMR spectra with high power proton decoupling were recorded using a  $\pi/2$  pulse length of 3.3  $\mu\text{s}$  and a recycle delay of 15 s. The chemical shift of  $^{31}\text{P}$  nucleus was externally referenced to  $(\text{NH}_4)_2\text{HPO}_4$  (1.0 ppm).

## 2.4 Supplementary characterization of materials

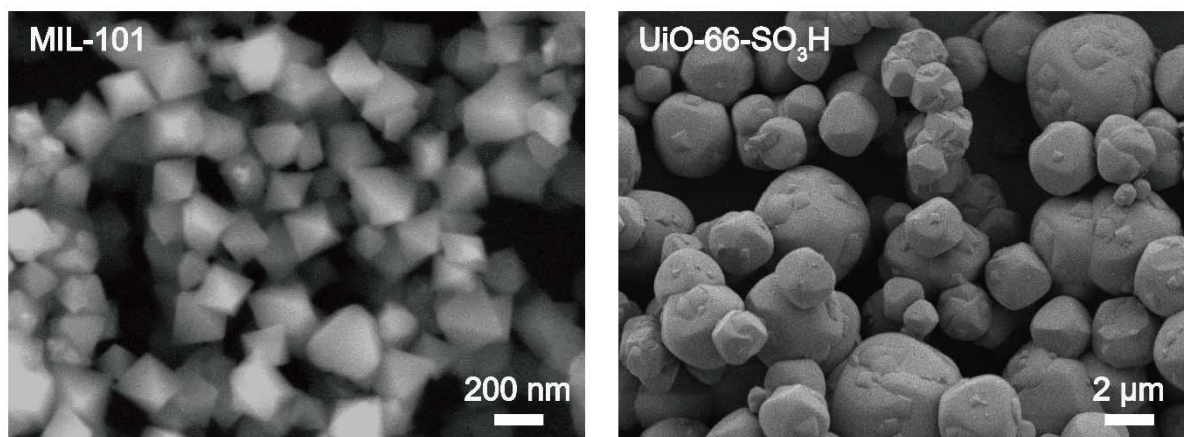

Figure S1. SEM image of MIL-101 and UiO-66-SO<sub>3</sub>H.

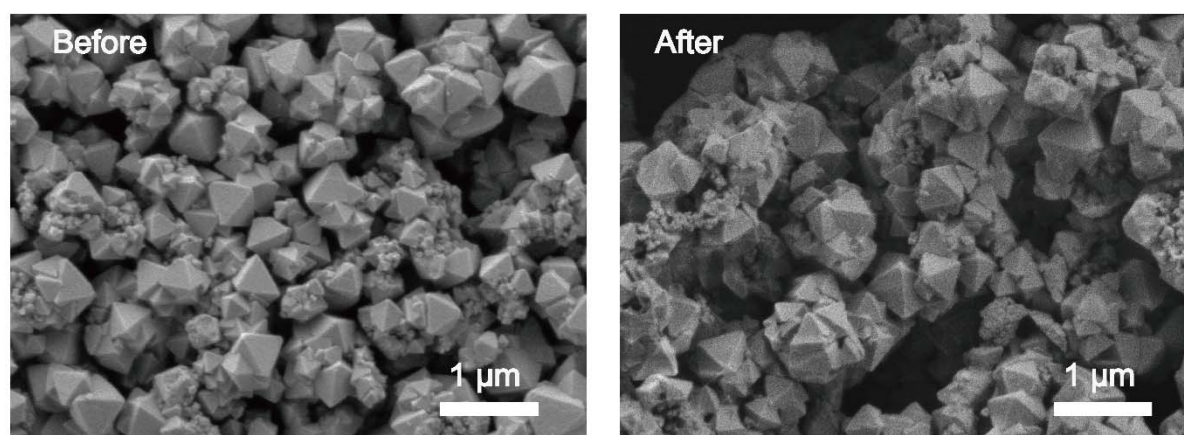

Figure S2. SEM of MIL-101-SO<sub>3</sub>H before and after reaction at 200 °C for 20 h.

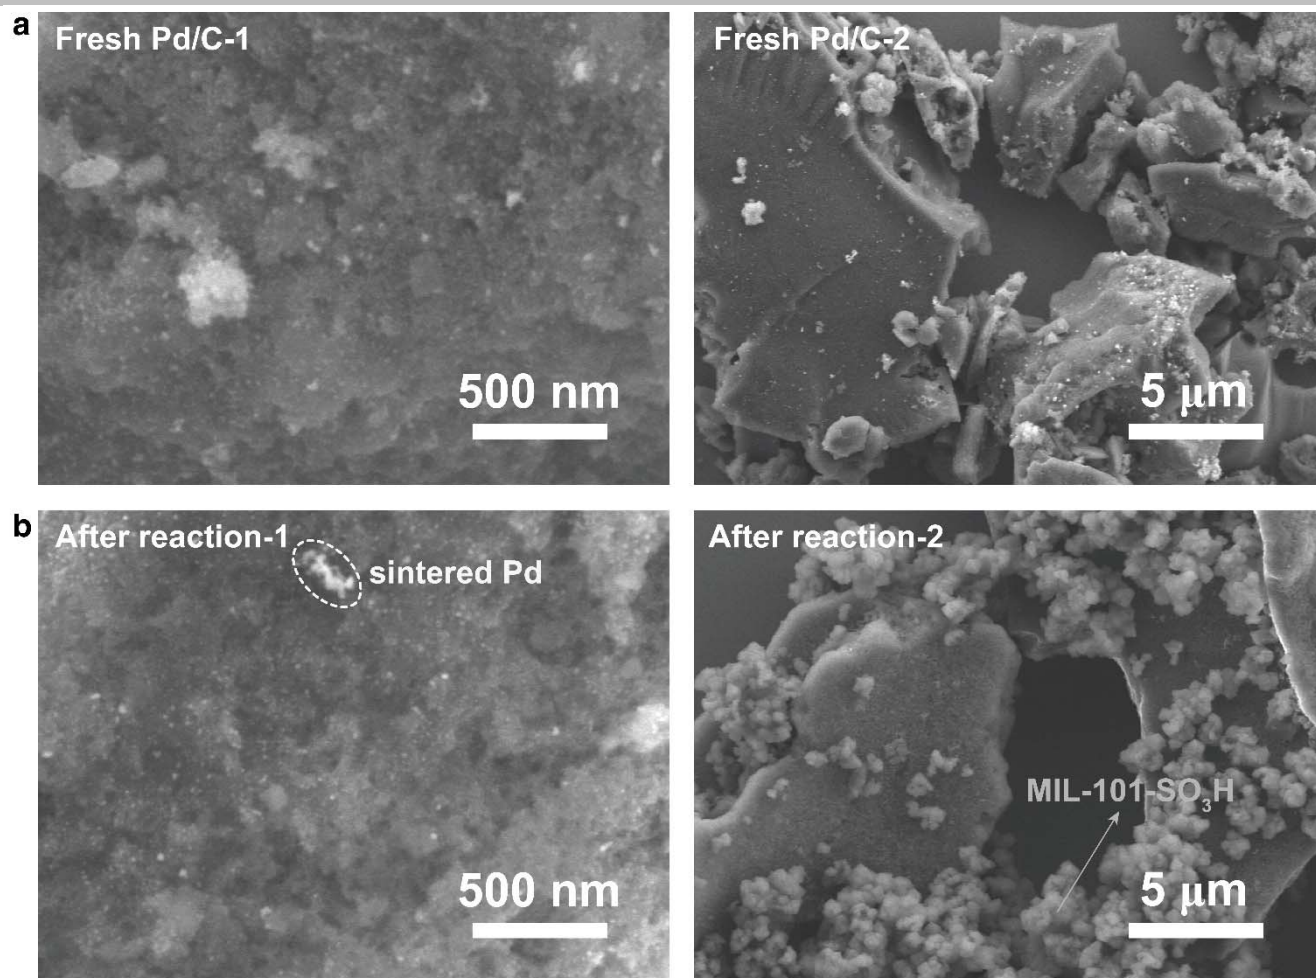

Figure S3. SEM of Pd/C before (fresh, **a**) and after reaction (**b**) at 200 °C for 20 h.

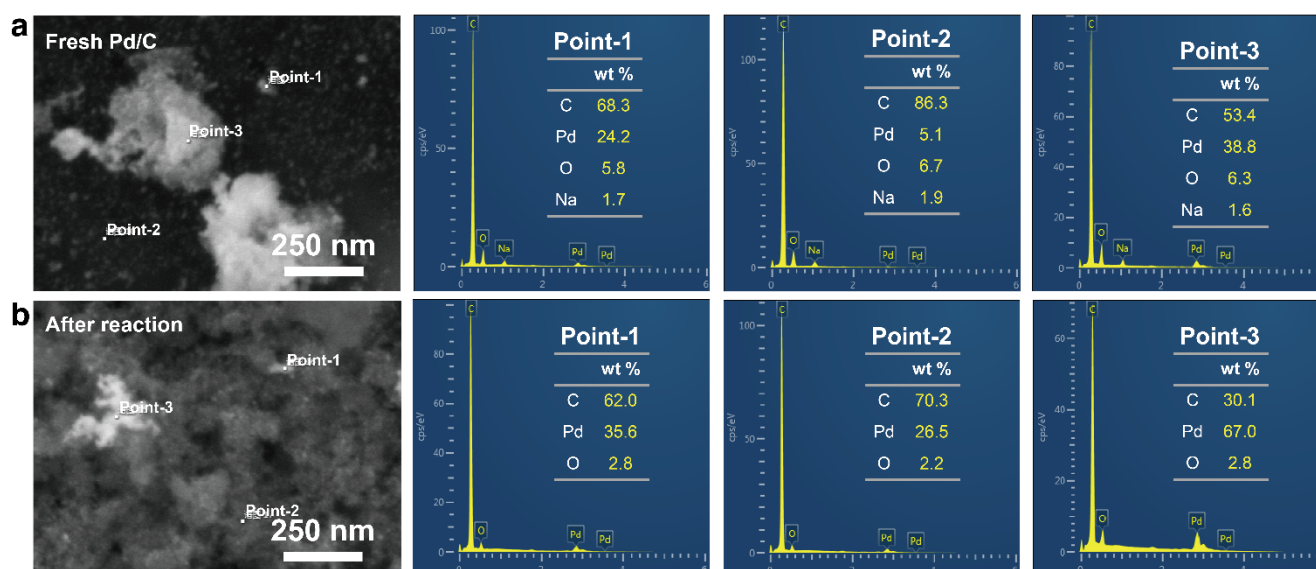

Figure S4. EDS of Pd/C before (fresh, **a**) and after reaction (**b**) at 200 °C for 20 h.

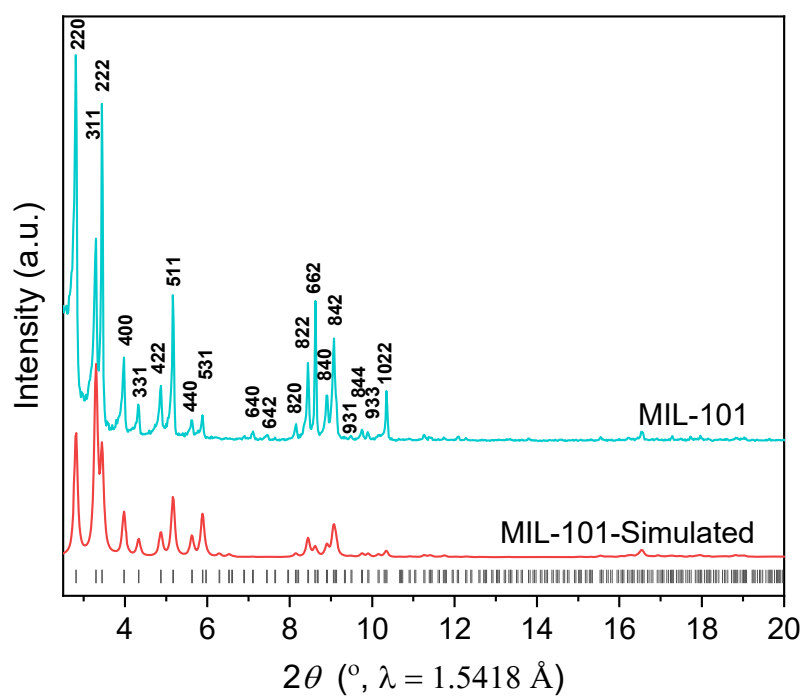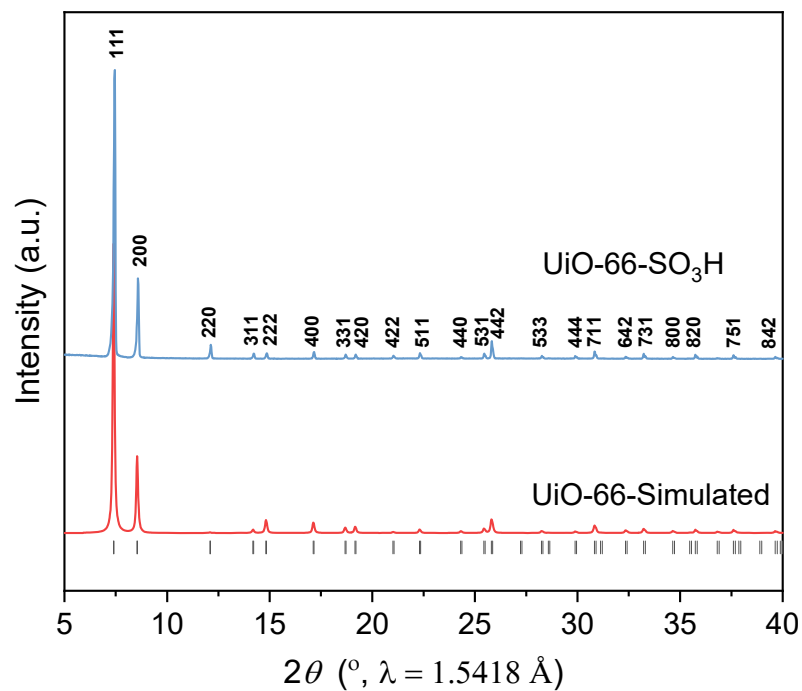

Figure S5. PXRD pattern of MIL-101, UiO-66-SO<sub>3</sub>H.

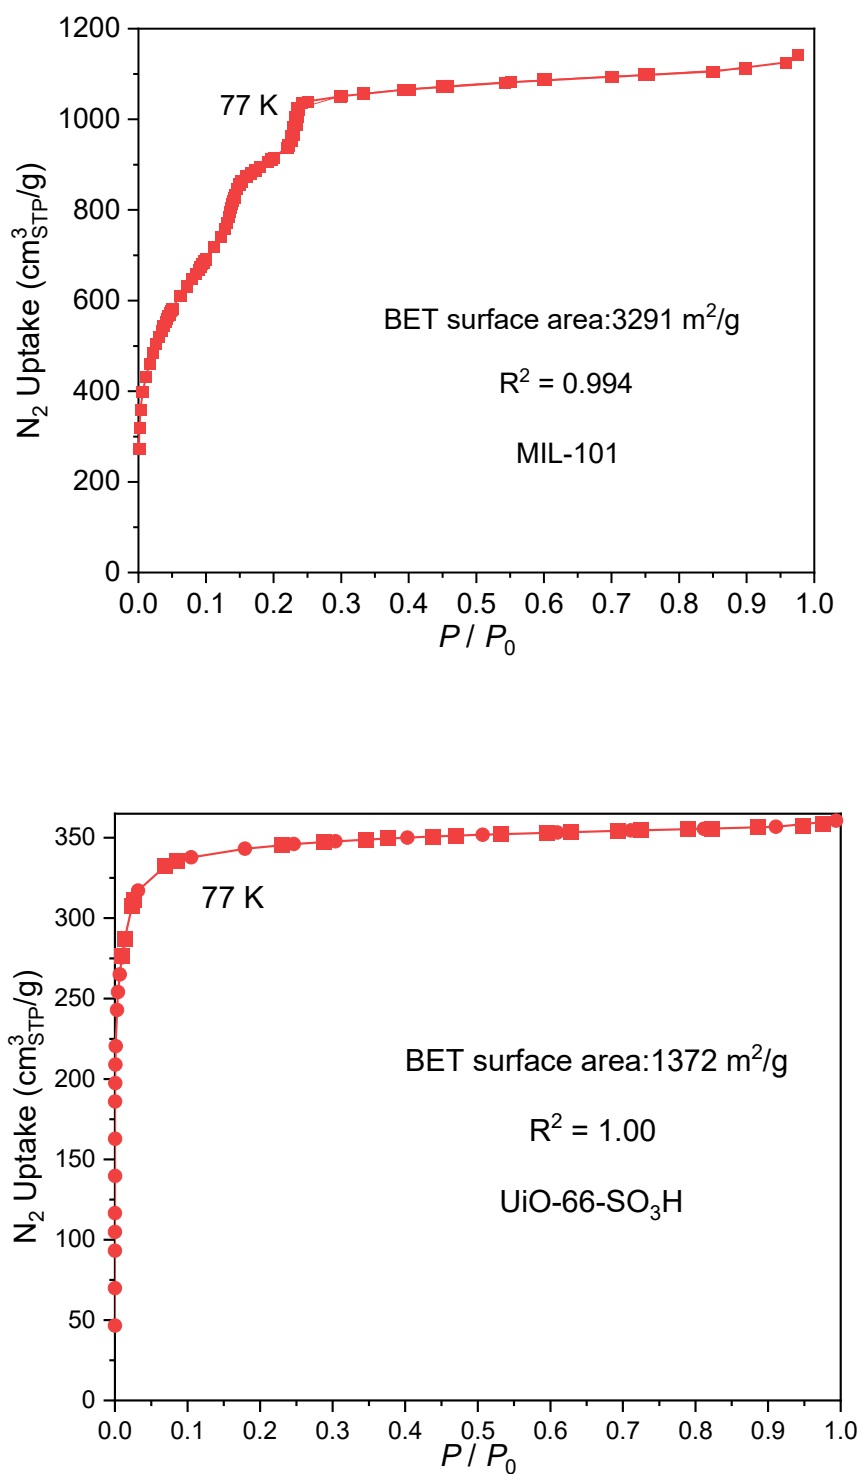

**Figure S6.** N<sub>2</sub> physisorption isotherms of MIL-101 and UiO-66-SO<sub>3</sub>H at 77 K.

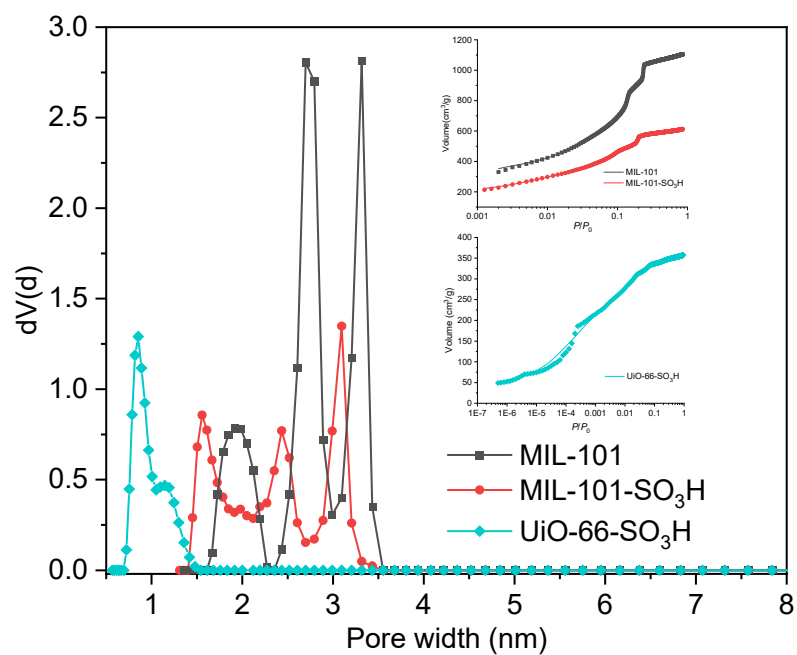

**Figure S7.** The pore size distribution of MIL-101 and MIL-101-SO<sub>3</sub>H derived from the QSDFT fitting of the adsorption branch of its N<sub>2</sub> physisorption isotherm at 77 K with minimal fitting error (0.422% for MIL-101, 0.262% for MIL-101-SO<sub>3</sub>H and 0.729% for UiO-66-SO<sub>3</sub>H).

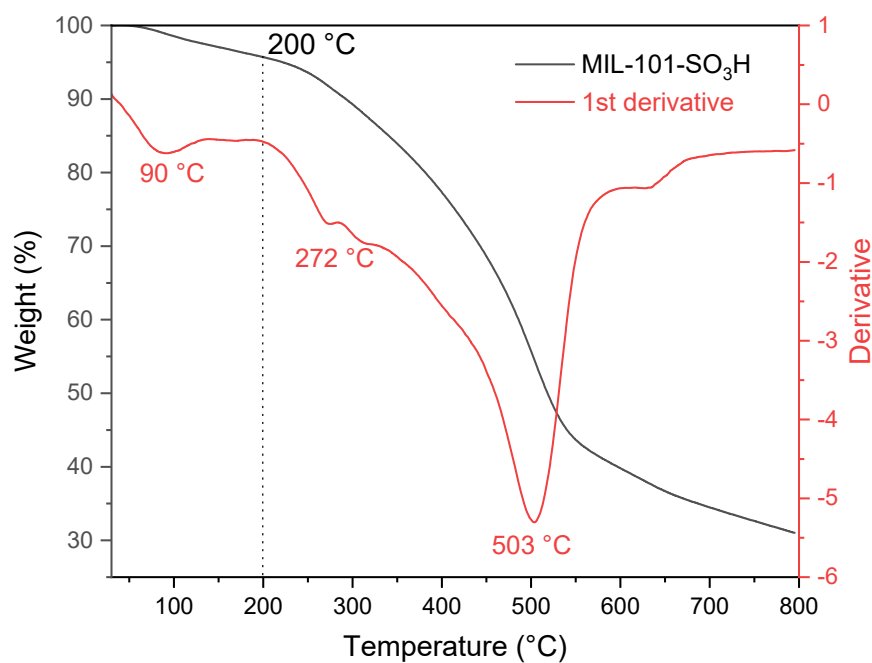

**Figure S8.** TGA of MIL-101-SO<sub>3</sub>H with 5 °C/min from 30 °C to 800 °C under N<sub>2</sub> flow. The 5.3% weight loss below 230 °C may be attributed to adsorbed water.

## 2.5 Static vapor adsorption

The vapor adsorption mainly occurs in the low pressure range where  $P/P_0$  is lower than 0.1. Figure S8 shows this range in logarithmic coordinates to signify the trends. 1,5-hexadiene and *n*-hexane are concave curves, while 2,5-DMTHF and 2-hexanol are convex curves, indicating that alkene and alkane may have weaker interaction with MIL-101-SO<sub>3</sub>H than ether and alcohol.

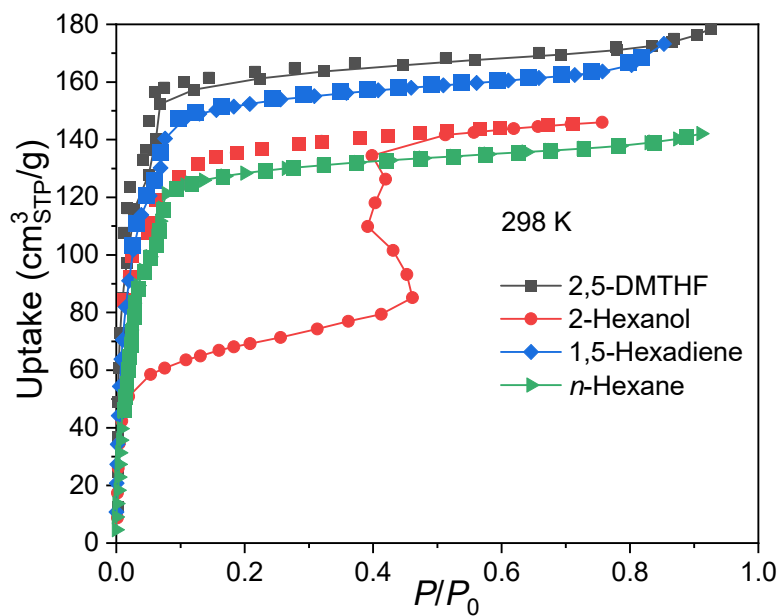

Figure S9. Comparison of vapor physisorption isotherms at 298 K in MIL-101-SO<sub>3</sub>H.

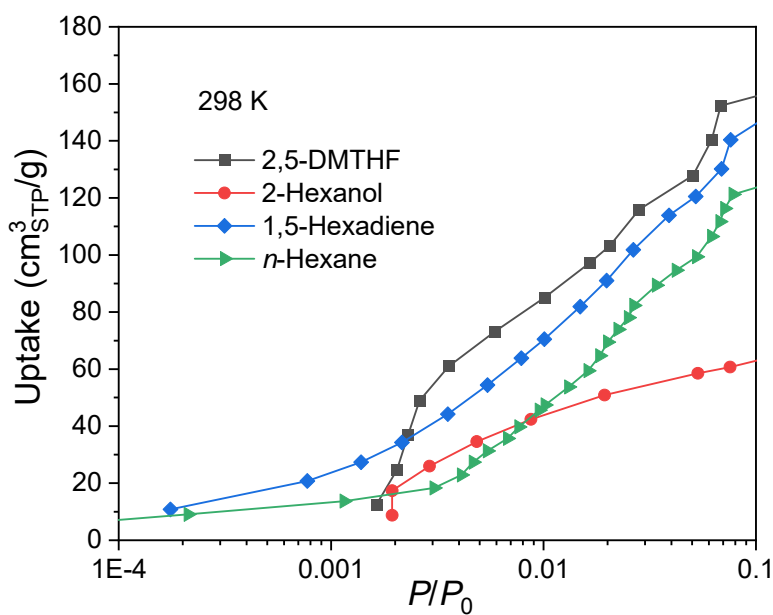

Figure S10. Logarithmic graph of vapor physisorption isotherms at 298 K in MIL-101-SO<sub>3</sub>H.

## 2.6 TGA-FTIR.

To study the affinity of MIL-101 framework with ether and alkene, we performed desorption tests with a Thermogravimetric analysis-Fourier transform infrared (TGA-FTIR) instrument. To avoid acid catalysis at high temperatures, MIL-101-SO<sub>3</sub>H was replaced by MIL-101 as their adsorption characteristics are similar. Experiment procedures: MIL-101 was completely immersed into a solution containing about 1:1:38 ether/alkene/solvent for 30 min. The solid was centrifuged and dried under vacuum. Then TGA-FTIR analysis was performed on the sample with 5 °C min<sup>-1</sup> temperature ramp under N<sub>2</sub> flow. The results showed that only the ether's signal was detected for two different ether and alkene pairs: 2,5-DMTHF with 1,5-hexadiene and 1,4-Cineole with  $\gamma$ -terpinene. The alkenes may have been pumped out during vacuum drying process, likely suggesting that they have poor affinity with the MIL-101 framework.

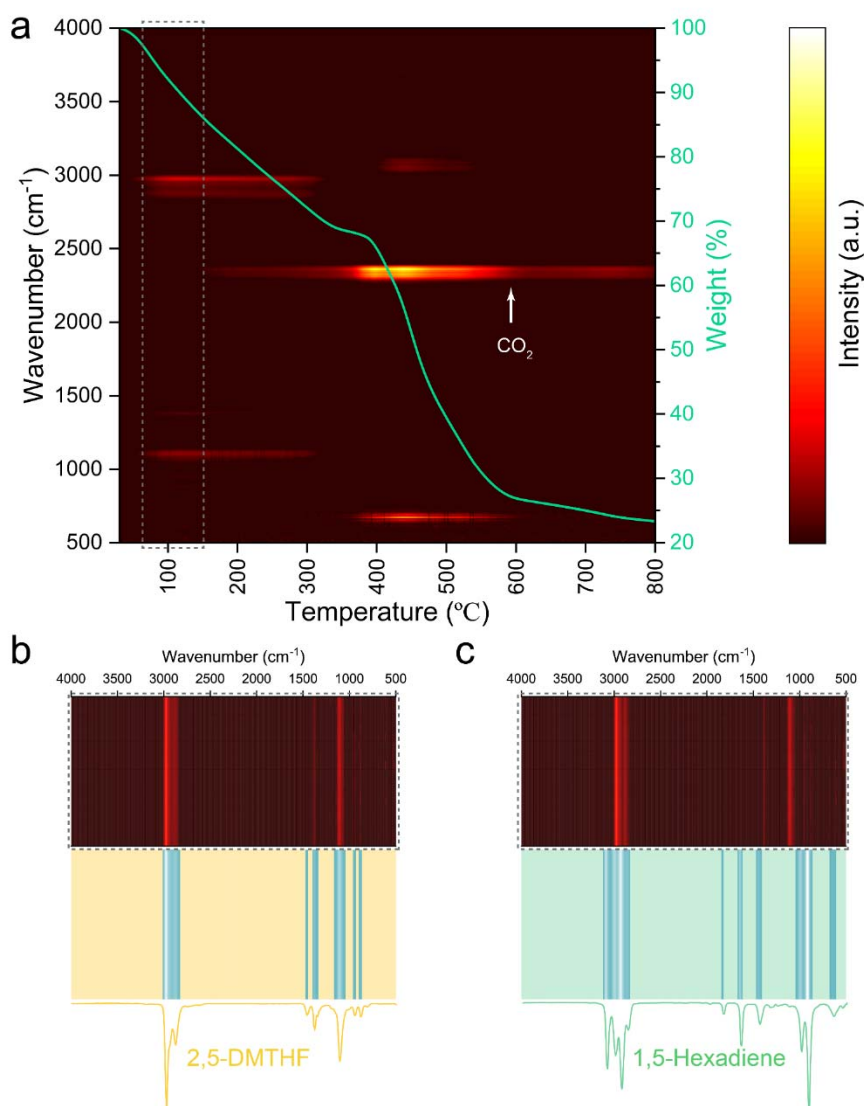

**Figure S11.** 2,5-DMTHF and 1,5-hexadiene competitive adsorption into MIL-101 was characterized by TGA-FTIR. a) TGA profile (green) and real-time FTIR spectra over the 30-800 °C temperature range. b) and c) 2,5-DMTHF (light-orange) and 1,5-hexadiene (light-cyan) spectra compared with the real-time FTIR, which showed only 2,5-DMTHF (ether) remained in MIL-101 after dried, 2365 cm<sup>-1</sup> and 2335 cm<sup>-1</sup> were assigned to CO<sub>2</sub> signal.

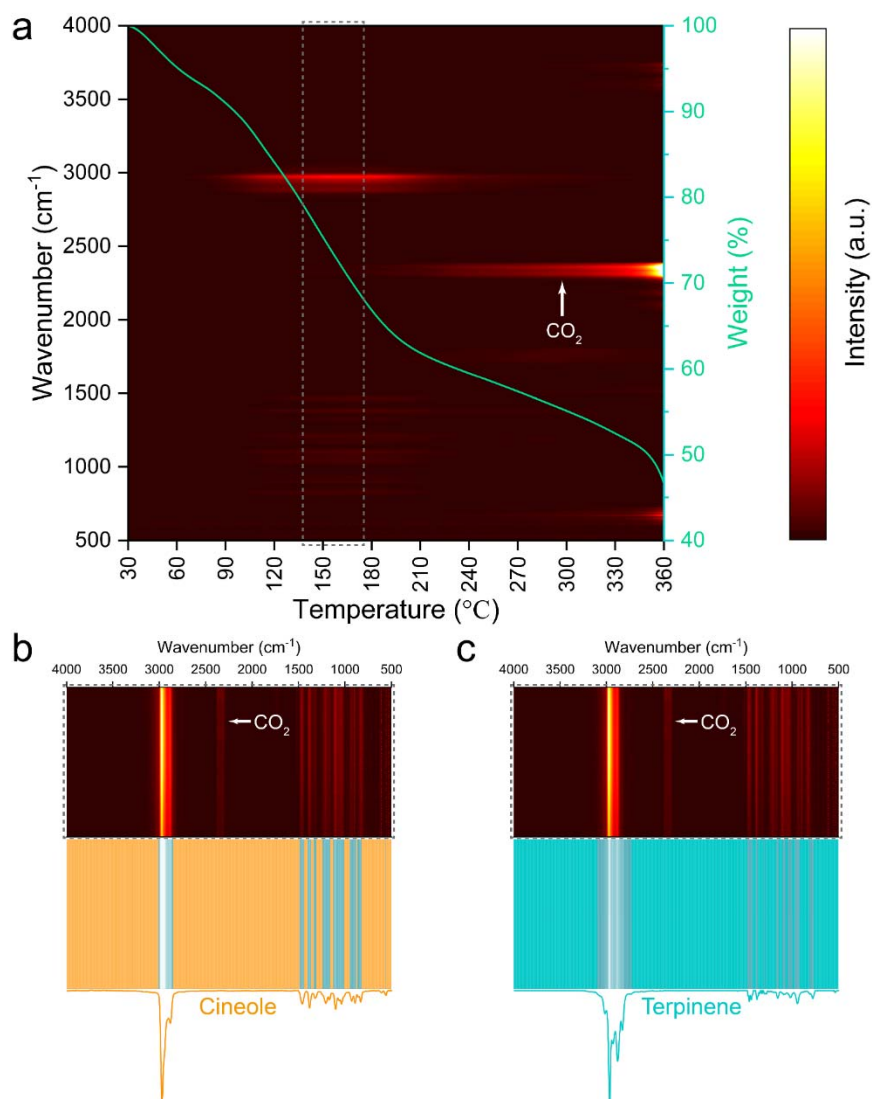

**Figure S12.** 1,4-Cineole and  $\gamma$ -terpinene competitive adsorption into MIL-101 was characterized by TGA-FTIR. a) TGA profile (green) and real-time FTIR spectra over the 30–360  $^{\circ}\text{C}$  temperature range. b) and c) 1,4-Cineole (orange) and  $\gamma$ -terpinene (cyan) spectra compared with the real-time FTIR, which showed only 1,4-cineole (ether) remained in MIL-101 after dried, 2365  $\text{cm}^{-1}$  and 2335  $\text{cm}^{-1}$  were assigned to  $\text{CO}_2$  signal.

## 2.7 ADS-CAL

Table S1. Adsorption heat of compounds with MIL-101-SO<sub>3</sub>H<sup>a</sup>

| Compound        | 2,5-DMTHF                                                                         | 2-Hexanol                                                                         | 1,5-Hexadiene                                                                     | <i>n</i> -Hexane                                                                   |
|-----------------|-----------------------------------------------------------------------------------|-----------------------------------------------------------------------------------|-----------------------------------------------------------------------------------|------------------------------------------------------------------------------------|
|                 | 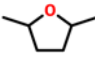 | 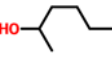 | 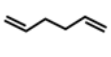 | 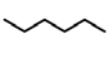 |
| Adsorption heat | -92.6 kJ mol <sup>-1</sup>                                                        | -83.5 kJ mol <sup>-1</sup>                                                        | -75.3 kJ mol <sup>-1</sup>                                                        | -75.0 kJ mol <sup>-1</sup>                                                         |

<sup>a</sup> Measured at 298 K, and the uptake of vapors about 3 cm<sup>3</sup>/g. The data collected from figure S13-S16.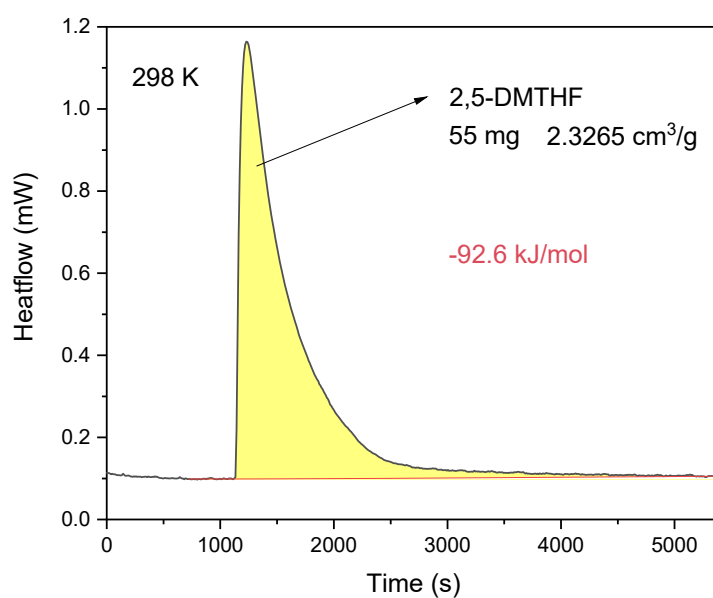Figure S13. Adsorption heat-flow graph of MIL-101-SO<sub>3</sub>H with 2,5-DMTHF.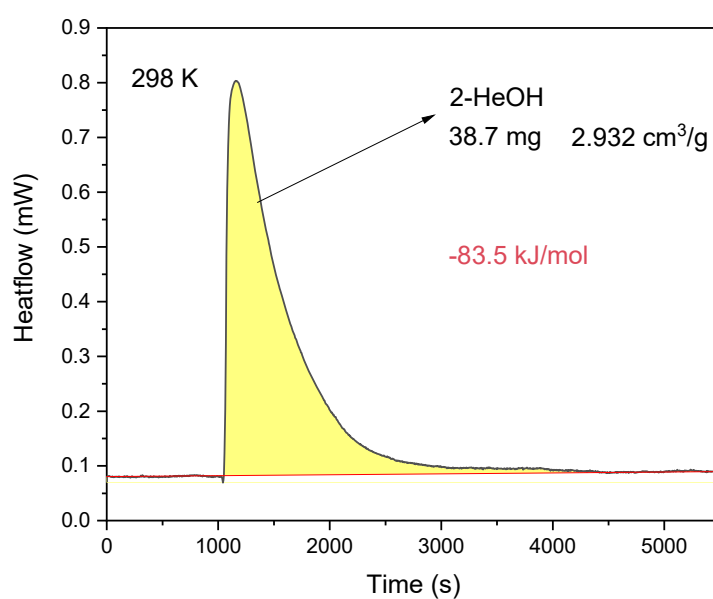Figure S14. Adsorption heat-flow graph of MIL-101-SO<sub>3</sub>H with 2-hexanol

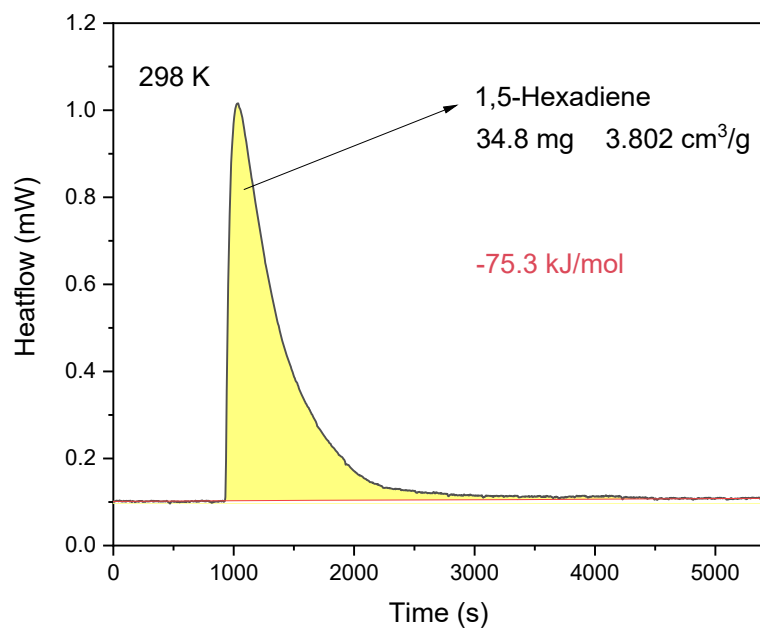

**Figure S15.** Adsorption heat-flow graph of MIL-101-SO<sub>3</sub>H with 1,5-hexadiene.

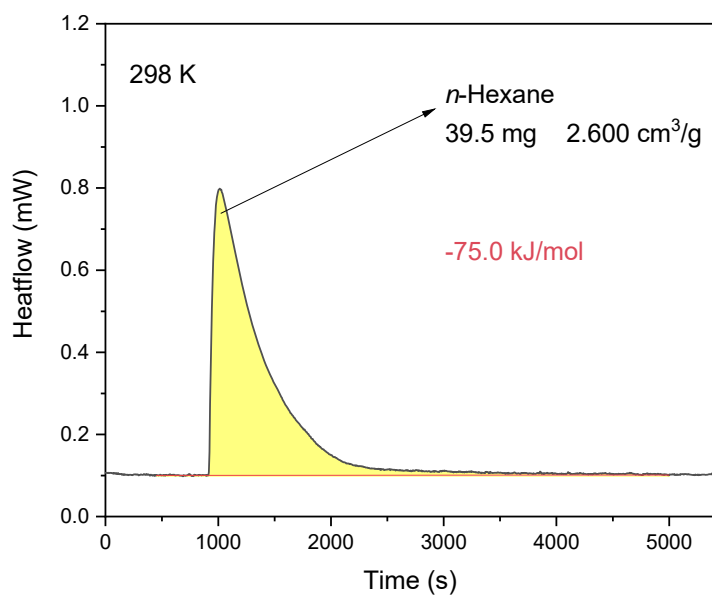

**Figure S16.** Adsorption heat-flow graph of MIL-101-SO<sub>3</sub>H with *n*-hexane

Table S2. Adsorption heat of 1,5-hexadiene and 2,5-DMTHF with MIL-101<sup>a</sup>

| Compound        | 2,5-DMTHF                                                                         | 1,5-Hexadiene                                                                     |
|-----------------|-----------------------------------------------------------------------------------|-----------------------------------------------------------------------------------|
|                 | 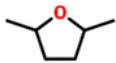 | 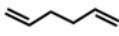 |
| Adsorption Heat | -107.7 kJ mol <sup>-1</sup>                                                       | -65.5 kJ mol <sup>-1</sup>                                                        |

<sup>a</sup> Measured at 298 K, and the uptake of vapors about 5 cm<sup>3</sup>/g. The data collected from figure S17-S18.

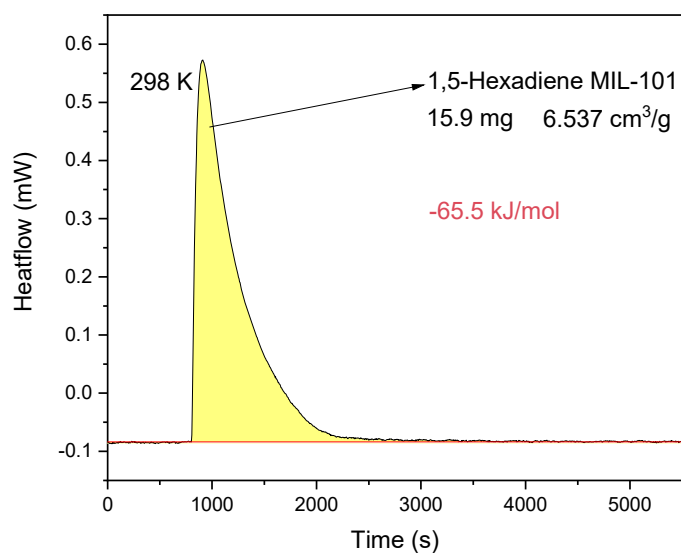

Figure S17. Adsorption heat-flow graph of MIL-101 and 1,5-hexadiene.

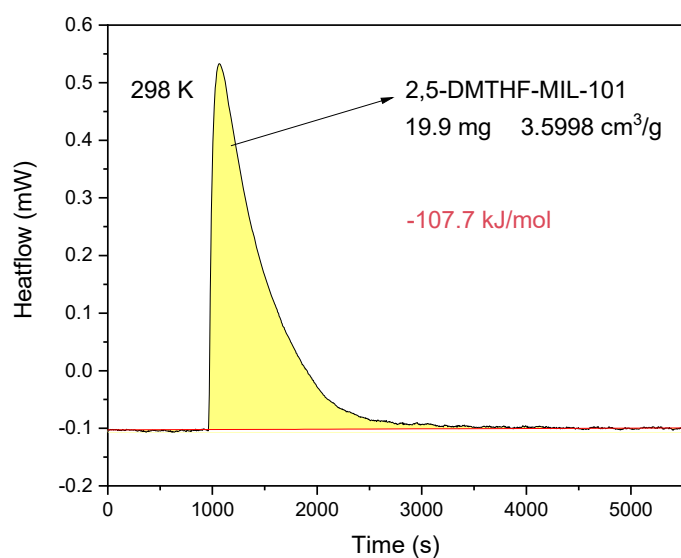

Figure S18. Adsorption heat-flow graph of MIL-101 and 2,5-DMTHF.

### 3. Synthesis of fuel precursors

**Standard procedure of 2-alkyfuran Dimerization:** This procedure was adapted from modified literature procedures.<sup>[6]</sup> 2-Alkyfuran (5 mmol, 1 equiv.), Pd(OAc)<sub>2</sub> (0.5 mmol, 10 mol %), H<sub>4</sub>SiMo<sub>12</sub>O<sub>40</sub> (0.25 mmol, 5 mol %) and DMSO (1 M) were subjected to an opened 20 mL glass vial, and stirred at 30 °C for 20 h. The reaction mixture was purified through a short silica gel, eluted by PE.

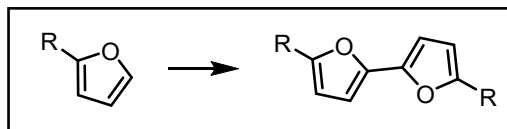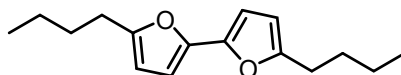

**5,5'-Dibutyl-2,2'-bifuran (FP3):** Standard procedure was followed. Brown oily liquid, yield 85%. <sup>1</sup>H NMR (500 MHz, CDCl<sub>3</sub>) δ 6.36 (d, *J* = 3.2 Hz, 2H), 6.01 (d, *J* = 3.3 Hz, 2H), 2.65 (t, *J* = 7.6 Hz, 4H), 1.64 (p, *J* = 7.6 Hz, 4H), 1.39 (h, *J* = 7.4 Hz, 4H), 0.93 (t, *J* = 7.4 Hz, 6H); <sup>13</sup>C NMR (126 MHz, CDCl<sub>3</sub>) δ 155.78, 145.21, 106.32, 104.87, 30.20, 27.77, 22.27, 13.83.

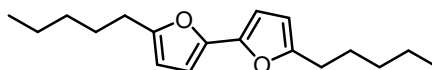

**5,5'-Dipentyl-2,2'-bifuran (FP4):** Standard procedure was followed. Brown oily liquid, yield 85%. <sup>1</sup>H NMR (400 MHz, CDCl<sub>3</sub>) δ 6.36 (d, *J* = 3.2 Hz, 2H), 6.01 (d, *J* = 3.2 Hz, 2H), 2.64 (t, *J* = 7.6 Hz, 4H), 1.66 (p, *J* = 7.5 Hz, 5H), 1.34 (h, *J* = 3.8 Hz, 9H), 0.97 – 0.85 (m, 7H); <sup>13</sup>C NMR (101 MHz, CDCl<sub>3</sub>) δ 155.82, 145.21, 106.32, 104.88, 31.39, 28.05, 27.78, 22.42, 14.02.

**Standard procedure of HAA condensation of aldehyde with 2-alkyfuran:**<sup>[7]</sup> aldehyde (2.0 mmol, 1.0 equiv.), 2-alkyfuran (4.0 mmol, 2.0 equiv.) and Hf(OTf)<sub>4</sub> (0.5 mol %) were subjected to a reaction vial and stirred at 45 °C. The reaction was monitored by <sup>1</sup>H-NMR, GC or TLC. Usually this reaction should be full converted within 4 h. The reaction mixture was then purified through a short silica gel, eluted by PE.

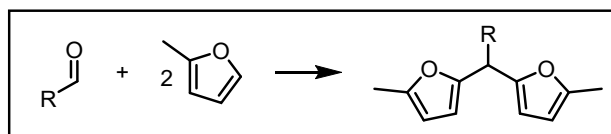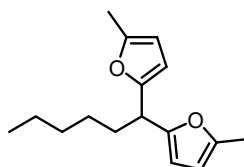

**5,5'-(Hexane-1,1-diyl)bis(2-methylfuran) (FP5):** Standard procedure was followed, for 8 h. Colorless oil, yield 85%. <sup>1</sup>H NMR (500 MHz, CDCl<sub>3</sub>) δ 5.91 (d, *J* = 2.7 Hz, 1H), 5.86 (s, 2H), 3.90 (t, *J* = 7.6 Hz, 2H), 2.25 (s, 6H), 1.92 (d, *J* = 6.6 Hz, 1H), 1.28 (s, 8H), 0.86 (t, *J* = 6.1 Hz, 3H); <sup>13</sup>C NMR (126 MHz, CDCl<sub>3</sub>) δ 154.21, 150.60, 105.99, 105.87, 38.99, 32.94, 31.61, 27.10, 22.51, 14.06, 13.62. HRMS (ESI) calcd. for C<sub>16</sub>H<sub>22</sub>O<sub>2</sub>H<sup>+</sup>: 247.1693. Found: 247.1685 (MH<sup>+</sup>).

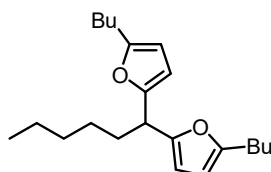

**5,5'-(Hexane-1,1-diyl)bis(2-butylfuran) (FP7):** Standard procedure was followed, stirred for 8 h. Colorless oil, yield 95%. <sup>1</sup>H NMR (400 MHz, CDCl<sub>3</sub>) δ 5.89 (d, *J* = 3.1 Hz, 2H), 5.85 (d, *J* = 3.1 Hz, 2H), 3.92 (t, *J* = 7.5 Hz, 1H), 2.57 (t, *J* = 7.6 Hz, 4H), 1.92 (q, *J* = 7.2 Hz, 2H), 1.58 (dd, *J* = 15.2, 7.6 Hz, 4H), 1.35 (q, *J* = 7.5 Hz, 4H), 1.31 – 1.22 (m, 8H), 0.92 (d, *J* = 7.3 Hz, 6H), 0.86 (s, 3H); <sup>13</sup>C NMR (101 MHz, CDCl<sub>3</sub>) δ 155.07, 154.06, 105.71, 104.92, 39.04, 33.13, 31.63, 30.24, 27.75, 27.06, 22.52, 22.25, 14.04, 13.84. HRMS (ESI) calcd. for C<sub>22</sub>H<sub>34</sub>O<sub>2</sub>H<sup>+</sup>: 331.2632. Found: 331.2623 (MH<sup>+</sup>).

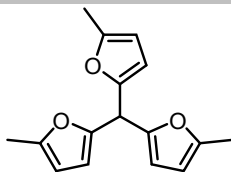

**Tris(5-methylfuran-2-yl)methane (FP6):** Standard procedure was followed, stirred for 2.5 h. Colorless to light brown oil, yield 96%.  $^1\text{H}$  NMR (500 MHz,  $\text{CDCl}_3$ )  $\delta$  5.96 (s, 3H), 5.89 (s, 3H), 5.36 (s, 1H), 2.25 (s, 12H);  $^{13}\text{C}$  NMR (126 MHz,  $\text{CDCl}_3$ )  $\delta$  151.46, 150.70, 107.82, 106.23, 39.16, 13.65. HRMS (ESI) calcd. for  $\text{C}_{16}\text{H}_{16}\text{O}_3\text{H}^+$ : 257.1172. Found: 257.1164 ( $\text{MH}^+$ ).

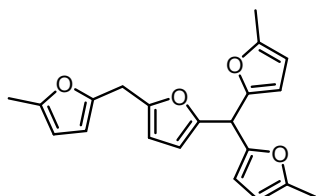

**5,5'-((5-((5-Methylfuran-2-yl)methyl)furan-2-yl)methylene)bis(2-methylfuran) (FP8):** Standard procedure was followed, 1 mol %  $\text{Hf}(\text{OTf})_4$  was used. Light green to red oil, yield 91%.  $^1\text{H}$  NMR (500 MHz,  $\text{CDCl}_3$ )  $\delta$  5.99 (d,  $J = 3.6$  Hz, 2H), 5.96 (d,  $J = 3.0$  Hz, 2H), 5.92 (d,  $J = 2.9$  Hz, 1H), 5.89 (d,  $J = 2.1$  Hz, 2H), 5.86 (d,  $J = 2.0$  Hz, 1H), 5.38 (s, 1H), 3.91 (s, 2H), 2.25 (s, 9H);  $^{13}\text{C}$  NMR (126 MHz,  $\text{CDCl}_3$ )  $\delta$  151.46, 151.34, 150.95, 150.52, 149.69, 107.91, 107.87, 107.06, 107.06, 106.21, 106.11, 39.13, 27.58, 13.64, 13.54. HRMS (ESI) calcd. for  $\text{C}_{21}\text{H}_{20}\text{O}_4\text{H}^+$ : 337.1434. Found: 337.1423 ( $\text{MH}^+$ ).

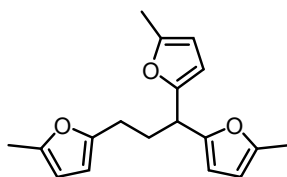

**5,5'-(Propane-1,1,3-triyl)tris(2-methylfuran) (FP9):** Standard procedure was followed. Colorless oil, yield 92%.  $^1\text{H}$  NMR (500 MHz,  $\text{CDCl}_3$ )  $\delta$  5.95 (d,  $J = 3.1$  Hz, 2H), 5.86 (d,  $J = 3.1$  Hz, 2H), 5.85 (d,  $J = 3.2$  Hz, 1H), 5.83 (d,  $J = 3.2$  Hz, 1H), 3.97 (t,  $J = 7.6$  Hz, 1H), 2.56 (t,  $J = 7.7$  Hz, 2H), 2.26 - 2.21 (m, 11H);  $^{13}\text{C}$  NMR (126 MHz,  $\text{CDCl}_3$ )  $\delta$  153.66, 153.44, 150.84, 150.33, 106.46, 105.95, 105.80, 105.69, 38.28, 31.21, 25.92, 13.62, 13.54.

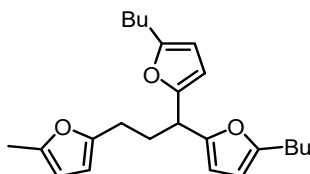

**5,5'-(3-(5-Methylfuran-2-yl)propane-1,1-diyl)bis(2-butylfuran) (FP10):** Standard procedure was followed. Colorless to light brown oil, yield 97%.  $^1\text{H}$  NMR (500 MHz,  $\text{CDCl}_3$ )  $\delta$  5.93 (d,  $J = 3.1$  Hz, 2H), 5.86 (d,  $J = 3.1$  Hz, 2H), 5.84 (d,  $J = 3.1$  Hz, 1H), 5.83 (d,  $J = 3.1$  Hz, 1H), 3.99 (t,  $J = 7.5$  Hz, 1H), 2.57 (dd,  $J = 9.3, 5.7$  Hz, 6H), 2.28 - 2.21 (m, 5H), 1.59 (p,  $J = 7.6$  Hz, 4H), 1.35 (h,  $J = 7.4$  Hz, 4H), 0.91 (t,  $J = 7.4$  Hz, 6H);  $^{13}\text{C}$  NMR (126 MHz,  $\text{CDCl}_3$ )  $\delta$  155.32, 153.76, 153.31, 150.31, 106.19, 105.80, 105.65, 105.01, 38.35, 31.45, 30.22, 27.77, 25.92, 22.28, 13.86, 13.54. HRMS (ESI) calcd. for  $\text{C}_{24}\text{H}_{32}\text{O}_3\text{H}^+$ : 369.2424. Found: 369.2418 ( $\text{MH}^+$ ).

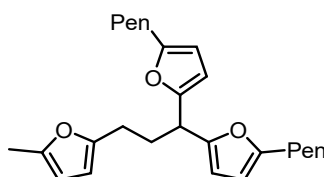

**5,5'-(3-(5-Methylfuran-2-yl)propane-1,1-diyl)bis(2-pentylfuran) (FP11):** Standard procedure was followed. Colorless to light yellow oil, yield 97%.  $^1\text{H}$  NMR (500 MHz,  $\text{CDCl}_3$ )  $\delta$  5.94 (d,  $J = 3.1$  Hz, 2H), 5.86 (d,  $J = 3.1$  Hz, 2H), 5.85 (d,  $J = 3.1$  Hz, 1H), 5.83 (d,  $J = 3.1$  Hz, 1H), 3.99 (t,  $J = 7.5$  Hz, 1H), 2.56 (t,  $J = 7.6$  Hz, 6H), 2.30 - 2.21 (m, 5H), 1.60 (t,  $J = 7.4$  Hz, 4H), 1.32 (dp,  $J = 8.3, 4.9, 4.2$

H<sub>2</sub>, 8H), 0.89 (t,  $J$  = 6.6 Hz, 6H); <sup>13</sup>C NMR (126 MHz, CDCl<sub>3</sub>)  $\delta$  155.35, 153.75, 153.29, 150.30, 106.17, 105.77, 105.61, 104.98, 38.33, 31.43, 31.38, 28.02, 27.75, 25.90, 22.42, 14.02, 13.52. HRMS (ESI) calcd. for C<sub>26</sub>H<sub>36</sub>O<sub>3</sub>H<sup>+</sup>: 397.2737. Found: 397.2732 (MH<sup>+</sup>).

#### 4. PHDO reactions.

All the hydrodeoxygenation and hydrogenation reactions were performed in zirconium alloy high pressure reactors purchased from Anhui Kemi Machinery Technology Co., LTD.

**Standard procedure for PHDO of eucalyptus oil:** 1,4-cineol (1.0 mmol, 1.0 equiv.), MIL-101-SO<sub>3</sub>H (1 mol %) and Pd/C (10 wt %) (0.2 mol %) were subjected to a 10 mL high pressure reactor liner. The liner was then placed in the reactor and sealed. The reactor was purged with 10 bar H<sub>2</sub> for 3 times before being pressurized to 30 bar. The reactor was then brought to 120 °C with vigorous stirring (Teflon stir bar, 420 r/min) for 3 h. After the designated reaction time, the reaction was stopped and the reactor cooled to rt before opening. Liquid phase was isolated through filtration. GC yields were determined by GC-FID analysis of crude reaction mixture calibrated by authentic *n*-C<sub>11</sub>H<sub>24</sub>; Isolate yield are obtained by weighing the isolated products through filtration and removal of solvent.

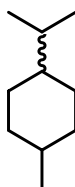

**1-Isopropyl-4-methylcyclohexane (DF1):** Standard procedure was followed. Using 1,4-cineol (154 mg), 96% isolated yield was obtained; Using 1,8-cineol (154 mg), 95% isolated yield was obtained; using *E. sideroxylon* (7.565g) mixture, 94% isolated yield was obtained. Colorless oil, cis-trans mixture. <sup>1</sup>H NMR (500 MHz, CDCl<sub>3</sub>)  $\delta$  1.68 (d,  $J$  = 2.8 Hz, 3H), 1.54 – 1.31 (m, 4H), 1.25 (th,  $J$  = 9.9, 3.3 Hz, 1H), 0.96 (m, 3H), 0.85 (t,  $J$  = 6.4 Hz, 9H); <sup>13</sup>C NMR (126 MHz, CDCl<sub>3</sub>)  $\delta$  43.87, 43.07, 35.62, 32.96, 32.92, 31.43, 30.50, 29.81, 29.21, 25.38, 22.75, 20.29, 19.87, 19.31.

GC condition: Agilent 7890B-FID detector; HP-5 column (30 m \* 320  $\mu$ m \* 0.25  $\mu$ m); Flow 6.5 mL min<sup>-1</sup>; Oven temperature: initial 40 °C, hold 2 min; rate 20 °C min<sup>-1</sup>, 300 °C, hold 2 min. Retention time: 4.04 min, 4.18 min.

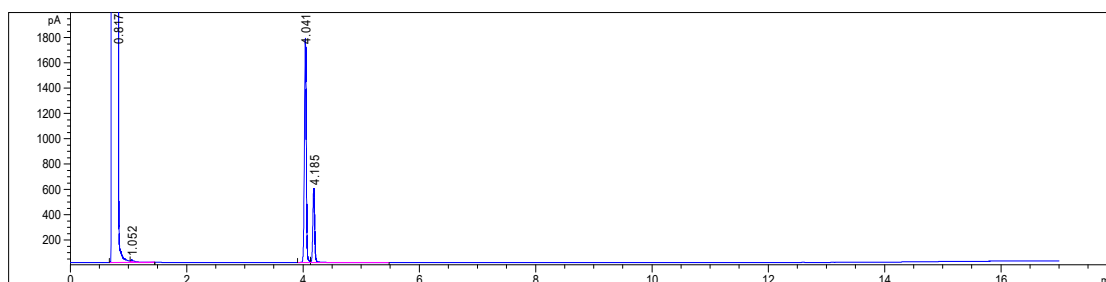

#### Standard procedure for PHDO of furan precursors:

Condition A: furan precursor (1.0 mmol, 1.0 equiv.), MIL-101-SO<sub>3</sub>H (0.5 mol % per furan unit) and Pd/C (10 wt %) (0.8 mol % per furan unit) were subjected to a 10 mL high pressure reactor liner. The liner was then placed in the reactor and sealed. The reactor was purged with 10 bar H<sub>2</sub> for 3 times before being pressurized to 40 bar. The reactor was then brought to 80 °C with vigorous stirring for 3 h, and then 200 °C for 10 h (Teflon stir bar, 420 r/min). After the designated reaction time, the reaction was stopped and the reactor cooled to room temperature before opening. Liquid phase was isolated through filtration. Isolate yield was obtained by weighing the isolated products through filtration and removal of solvent. GC purity was determined by GC-FID analysis of crude reaction mixture calibrated by authentic *n*-C<sub>16</sub>H<sub>34</sub> and 6-pentylcetane.

Condition B: furan precursor (0.2 mmol, 1.0 equiv.), MIL-101-SO<sub>3</sub>H (2.5 mol % per furan unit), Pd/C (5 wt %) (4.0 mol % per furan unit) and 1 mL hexane were subjected to a 10 mL high pressure reactor liner. The liner was then placed in the reactor and sealed. The

reactor was purged with 10 bar  $H_2$  for 3 times before being pressurized to 40 bar. The reactor was then brought to 80 °C with vigorous stirring for 3 h, and then 200 °C for 10 h (Teflon stir bar, 420 r/min). After the designated reaction time, the reaction was stopped and the reactor cooled to room temperature before opening. Liquid phase was isolated through filtration. Isolate yield was obtained by weighing the isolated products through filtration and removal of solvent. GC purity was determined by GC-FID analysis of crude reaction mixture calibrated by authentic  $n$ - $C_{16}H_{34}$  and 6-pentylcetane.

GC condition: Agilent 7890B-FID detector; HP-5 column (30 m \* 320  $\mu$ m \* 0.25  $\mu$ m); Flow 6.5 mL  $min^{-1}$ ; Oven temperature: initial 100 °C, hold 2 min; rate 10 °C  $min^{-1}$ , 250 °C, hold 5 min.

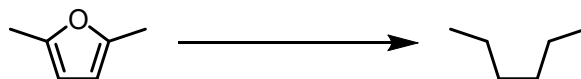

***n*-Hexane (DF2):** In a 10 mmol scale, condition B was followed, cyclohexane as solvent and stirred at 80 °C for 3 hours, then 200 °C for 20 hours. Colorless liquid, NMR yield 66%, and calibrated by 1,1,2,2-tetrachloroethane. The product structure was determined by NMR.  $^1H$  NMR (400 MHz,  $CDCl_3$ )  $\delta$  1.36 – 1.22 (m, 8H), 0.89 (t,  $J$  = 6.7 Hz, 6H);  $^{13}C$  NMR (101 MHz,  $CDCl_3$ )  $\delta$  31.61, 22.66, 14.08.

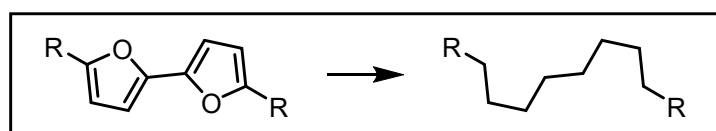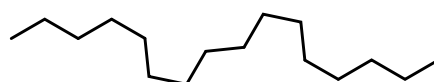

***n*-Cetane (DF3):** Condition A was followed. Colorless oily liquid, isolated yield 94%, GC purity 97%.  $^1H$  NMR (500 MHz,  $CDCl_3$ )  $\delta$  1.31 – 1.26 (m, 28H), 0.88 (t,  $J$  = 6.8 Hz, 6H);  $^{13}C$  NMR (126 MHz,  $CDCl_3$ )  $\delta$  31.95, 29.72, 29.68, 29.39, 22.71, 14.12. Retention time: 7.27 min.

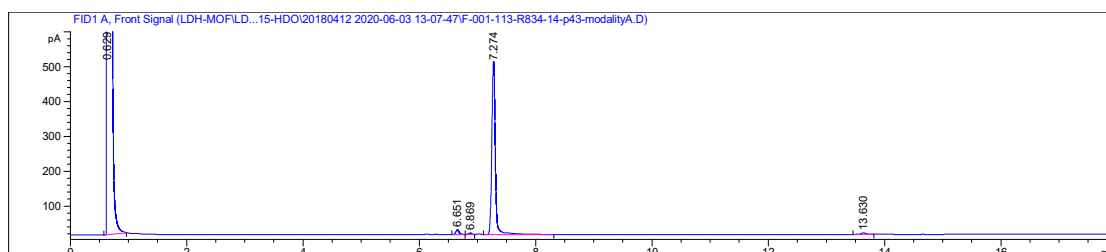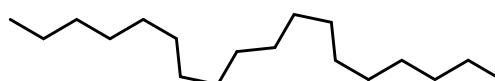

***n*-Octadecane (DF4):** Condition A was followed. White wax like solid, isolated yield 98%, GC purity 98%.  $^1H$  NMR (400 MHz,  $CDCl_3$ )  $\delta$  1.39 – 1.18 (m, 32H), 0.88 (t,  $J$  = 6.7 Hz, 6H);  $^{13}C$  NMR (101 MHz,  $CDCl_3$ )  $\delta$  31.96, 29.74, 29.70, 29.40, 22.72, 14.11. Retention time: 9.44 min.

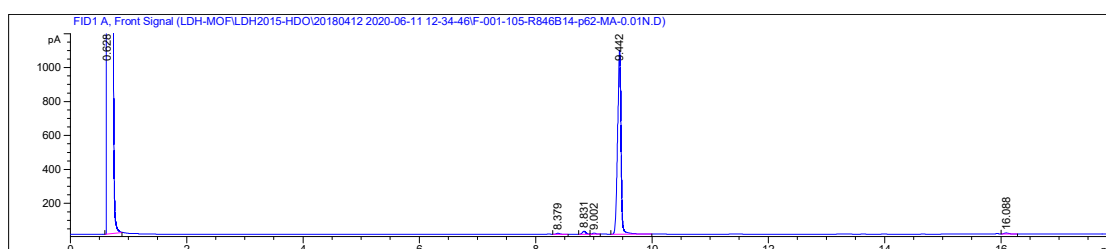

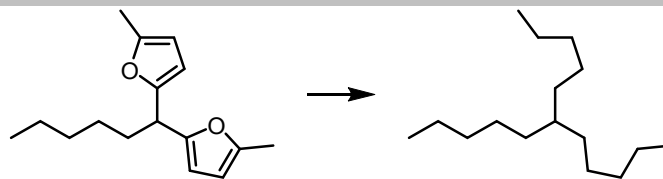

**6-Pentylundecane from FP7 (DF5):** Conditions A & B were followed. Colorless liquid. Condition A: isolated yield 88%, GC purity 91%; Condition B: isolated yield 96%, GC purity 97%.  $^1\text{H}$  NMR (500 MHz,  $\text{CDCl}_3$ )  $\delta$  1.40 – 1.13 (m, 25H), 0.88 (t,  $J$  = 7.1 Hz, 9H).  $^{13}\text{C}$  NMR (126 MHz,  $\text{CDCl}_3$ )  $\delta$  37.43, 33.65, 32.42, 26.39, 22.76, 14.17. Retention time: 6.09 min.

GC chromatogram of condition A reaction mixture:

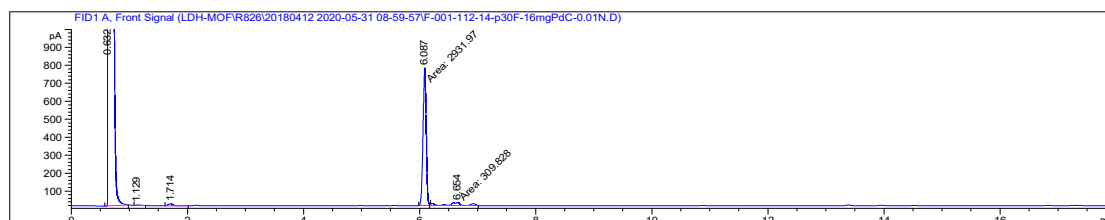

GC chromatogram of condition B reaction mixture:

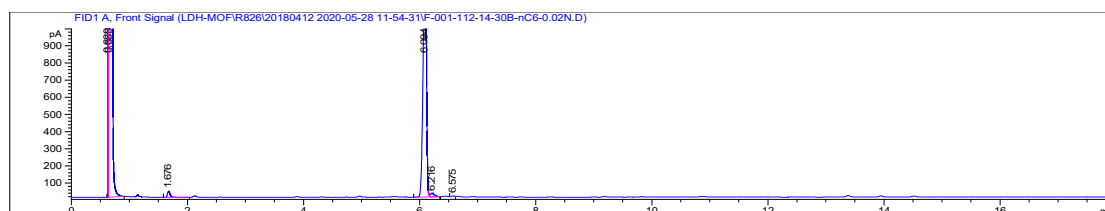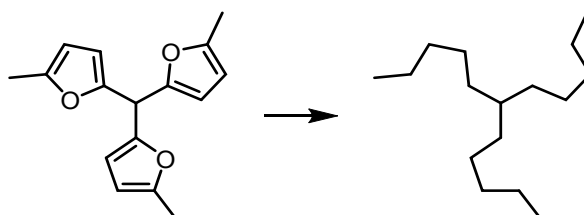

**6-Pentylundecane from FP8 (DF5/6):** Condition B was followed. Colorless liquid, isolated yield 93%, GC purity 99%.  $^1\text{H}$  NMR (500 MHz,  $\text{CDCl}_3$ )  $\delta$  1.40 – 1.13 (m, 25H), 0.88 (t,  $J$  = 7.1 Hz, 9H).  $^{13}\text{C}$  NMR (126 MHz,  $\text{CDCl}_3$ )  $\delta$  37.43, 33.65, 32.42, 26.39, 22.76, 14.17. Retention time: 6.08 min.

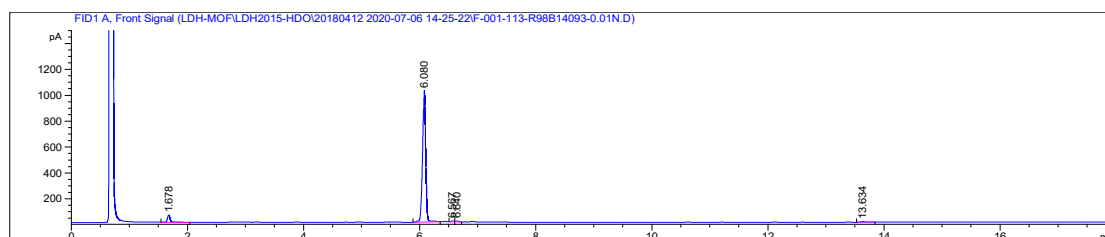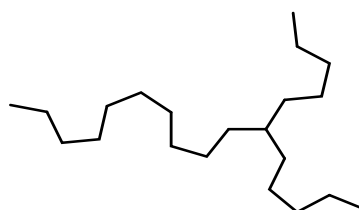

**6-Pentylhexadecane (DF8):** Condition B was followed. Colorless liquid mixture, isolate yield 70% (colorless liquid mixture), GC purity 79%.  $^1\text{H}$  NMR (500 MHz,  $\text{CDCl}_3$ )  $\delta$  1.40 – 1.13 (m, 35H), 0.92 – 0.85 (m, 9H).  $^{13}\text{C}$  NMR (126 MHz,  $\text{CDCl}_3$ )  $\delta$  37.42, 33.69, 33.66, 32.42, 31.96, 30.18, 29.75, 29.74, 29.69, 29.40, 26.71, 26.39, 22.76, 22.72, 14.17, 14.15. Retention time: 11.18 min.

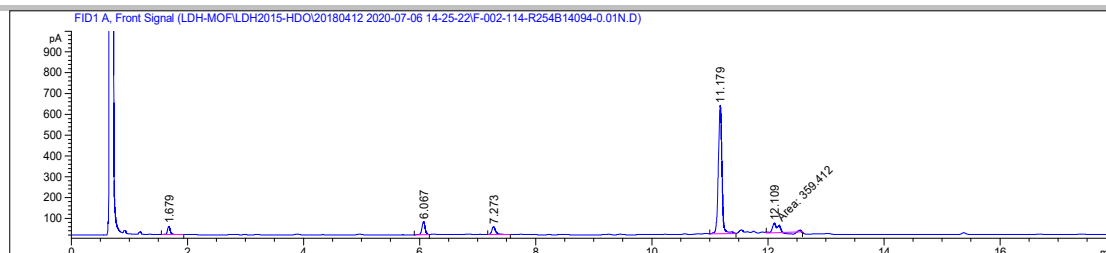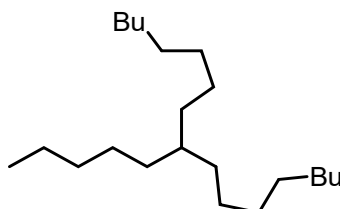

**9-Pentylheptadecane (DF7):** Condition A was followed. Colorless liquid, isolated yield 94%, GC purity 98%. In a 10 g scale, Condition A was still followed, isolated yield 91%.  $^1\text{H}$  NMR (400 MHz,  $\text{CDCl}_3$ )  $\delta$  1.32 – 1.05 (d,  $J$  = 15.3 Hz, 41H), 0.81 (t,  $J$  = 6.8 Hz, 9H);  $^{13}\text{C}$  NMR (101 MHz,  $\text{CDCl}_3$ )  $\delta$  37.44, 33.73, 33.69, 32.43, 31.98, 30.20, 29.73, 29.42, 26.74, 26.41, 22.75, 22.72, 14.13, 14.11. Retention time: 12.01 min.

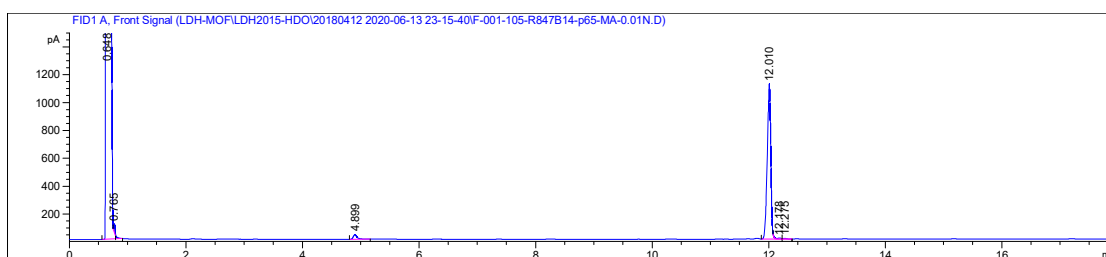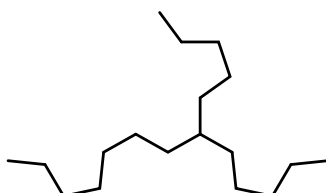

**6-Pentyltridecane (DF9):** Conditions A & B were followed. Condition A: isolated 74% (colorless liquid mixture), GC purity 82%; Condition B: isolated yield 88%, GC purity 94%. Colorless liquid.  $^1\text{H}$  NMR (400 MHz,  $\text{CDCl}_3$ )  $\delta$  1.36 – 1.03 (m, 29H), 0.81 (t,  $J$  = 7.0 Hz, 9H);  $^{13}\text{C}$  NMR (101 MHz,  $\text{CDCl}_3$ )  $\delta$  37.44, 33.71, 33.68, 32.41, 31.96, 30.15, 29.41, 26.73, 26.39, 22.74, 22.72, 14.14, 14.12. Retention time: 8.23 min.

GC chromatogram of condition A reaction mixture:

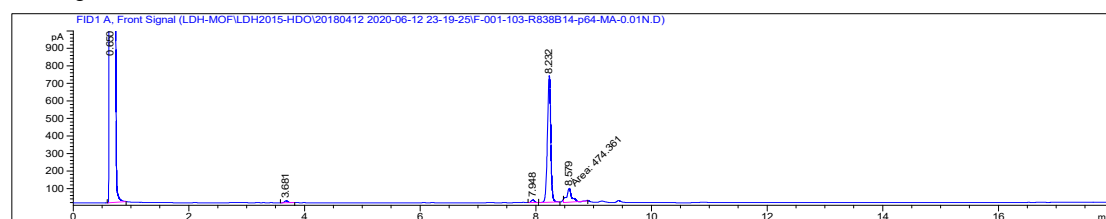

GC chromatogram of condition B reaction mixture:

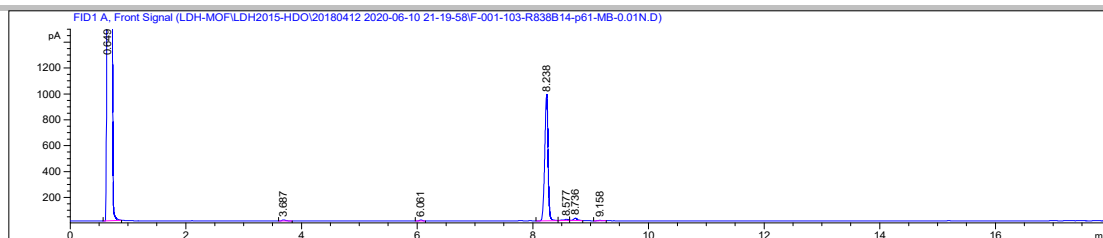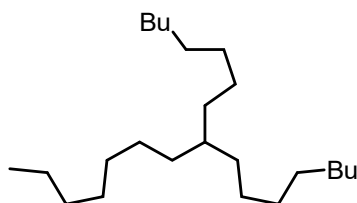

**9-Heptylheptadecane (DF10):** Conditions A & B were followed. Condition A: isolated yield 94% (colorless liquid mixture), GC purity 83%; Condition B: isolated yield 98%, GC purity 97%.  $^1\text{H}$  NMR (500 MHz,  $\text{CDCl}_3$ )  $\delta$  1.34 – 1.15 (m, 41H), 0.88 (t,  $J$  = 6.9 Hz, 9H);  $^{13}\text{C}$  NMR (126 MHz,  $\text{CDCl}_3$ )  $\delta$  37.40, 33.71, 31.95, 30.17, 30.14, 29.70, 29.41, 29.39, 26.72, 26.71, 22.71, 22.70, 14.13. Retention time: 13.63 min.

GC chromatogram of condition A reaction mixture:

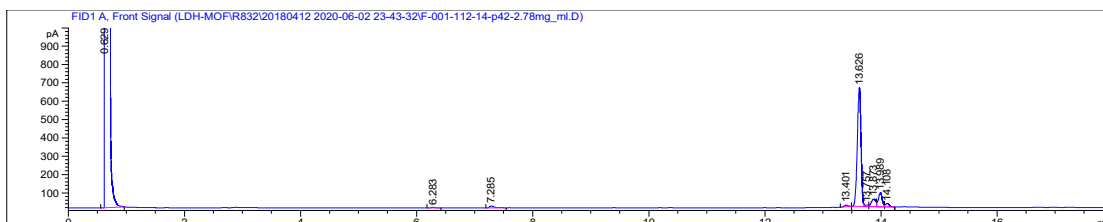

GC chromatogram of condition B reaction mixture:

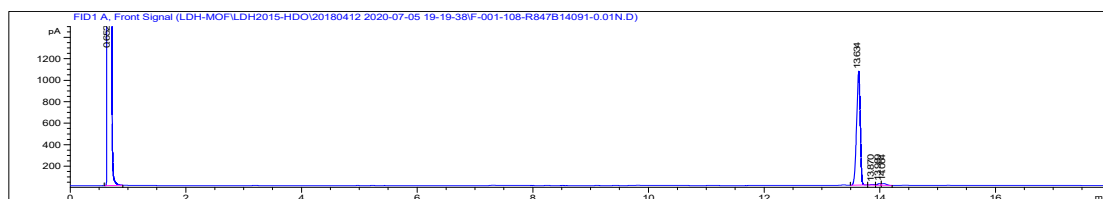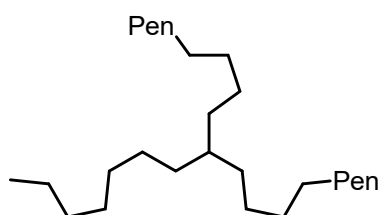

**10-Heptylnonadecane (DF11):** Conditions A & B were followed. Condition A: isolated yield 97% (colorless liquid mixture), GC purity 76%; Condition B: isolated yield 95%, GC purity 95%.  $^1\text{H}$  NMR (500 MHz,  $\text{CDCl}_3$ )  $\delta$  1.35 – 1.17 (m, 45H), 0.88 (t,  $J$  = 6.8 Hz, 9H);  $^{13}\text{C}$  NMR (126 MHz,  $\text{CDCl}_3$ )  $\delta$  37.40, 33.71, 33.70, 31.95, 31.94, 30.16, 30.14, 29.74, 29.71, 29.68, 29.41, 29.38, 26.72, 26.71, 22.71, 14.13. Retention time: 15.17 min.

GC chromatogram of condition A reaction mixture:

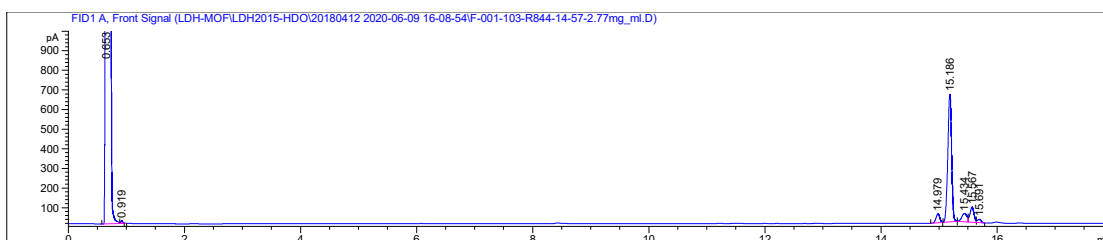

GC chromatogram of condition B reaction mixture:

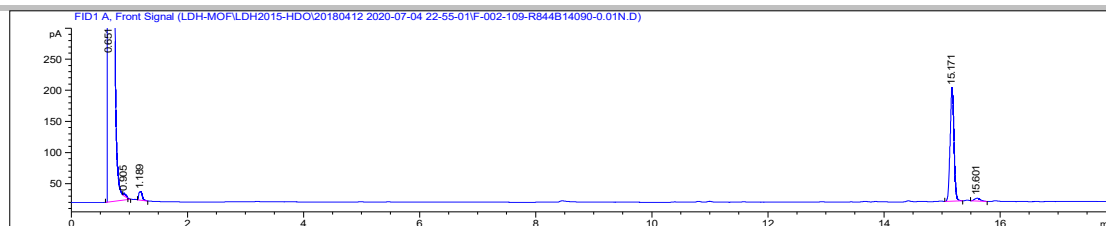

## 5. NMR spectra of fuel precursors and designer fuels

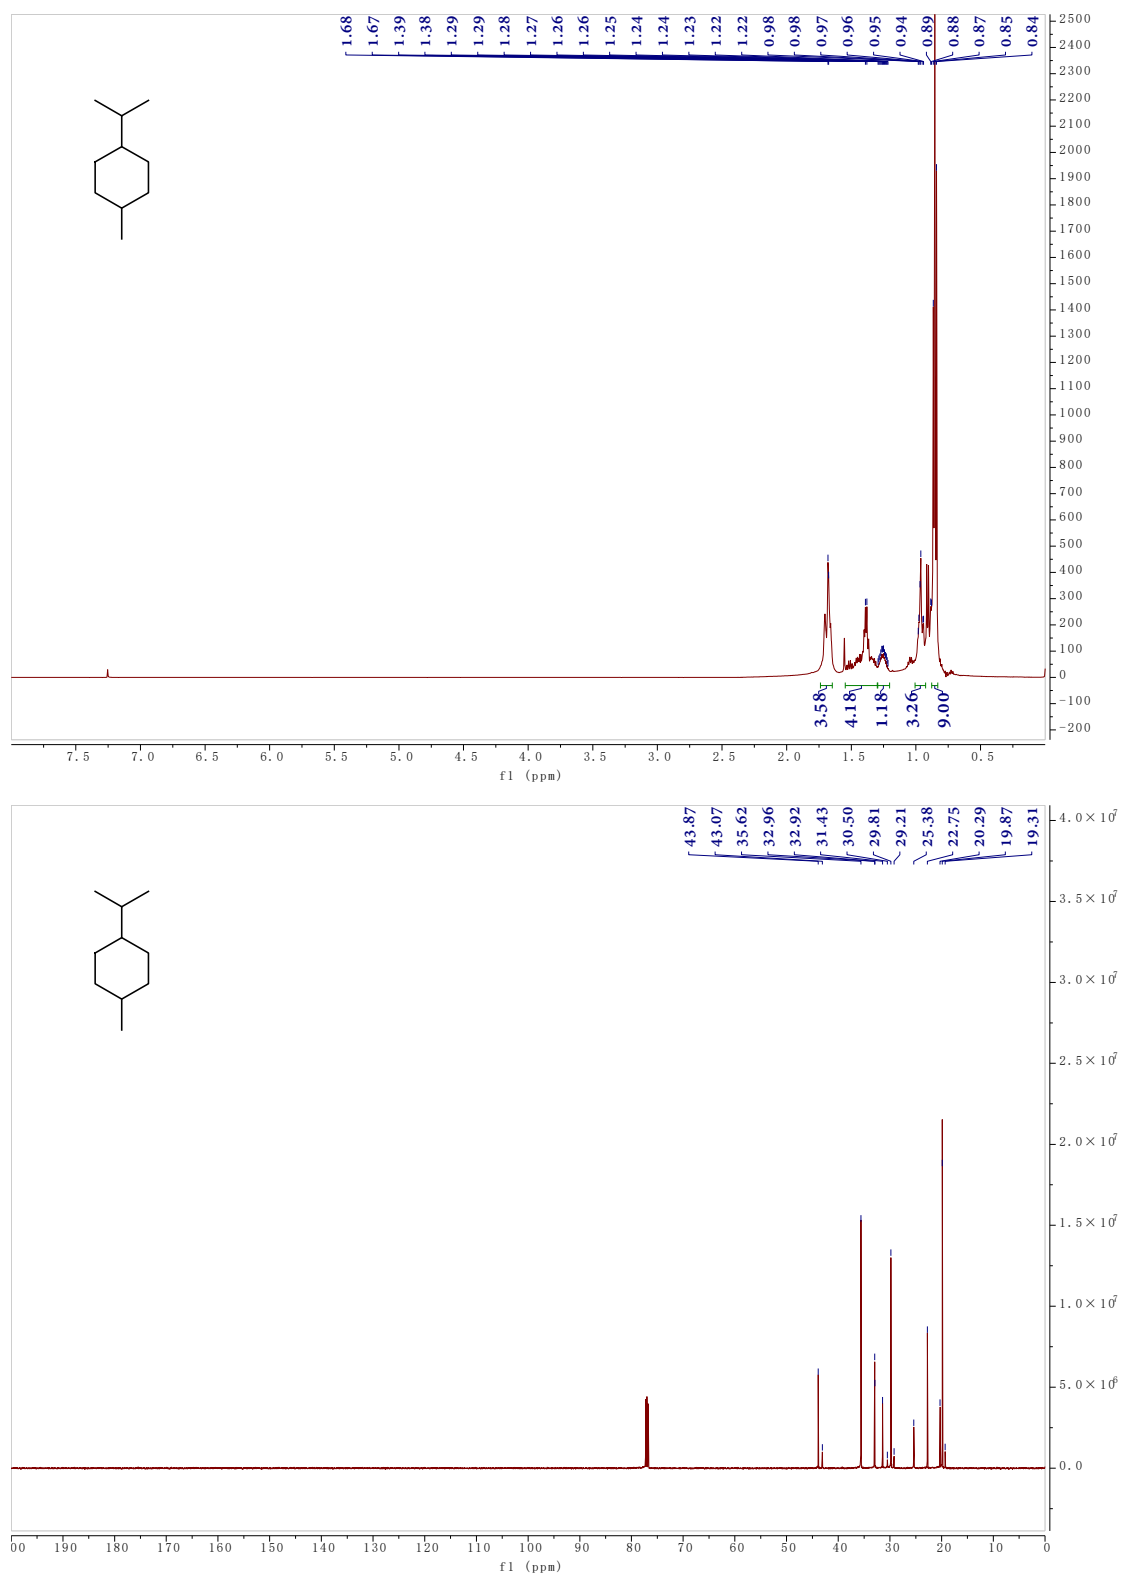Figure S19. <sup>1</sup>H and <sup>13</sup>C-NMR spectra of DF1

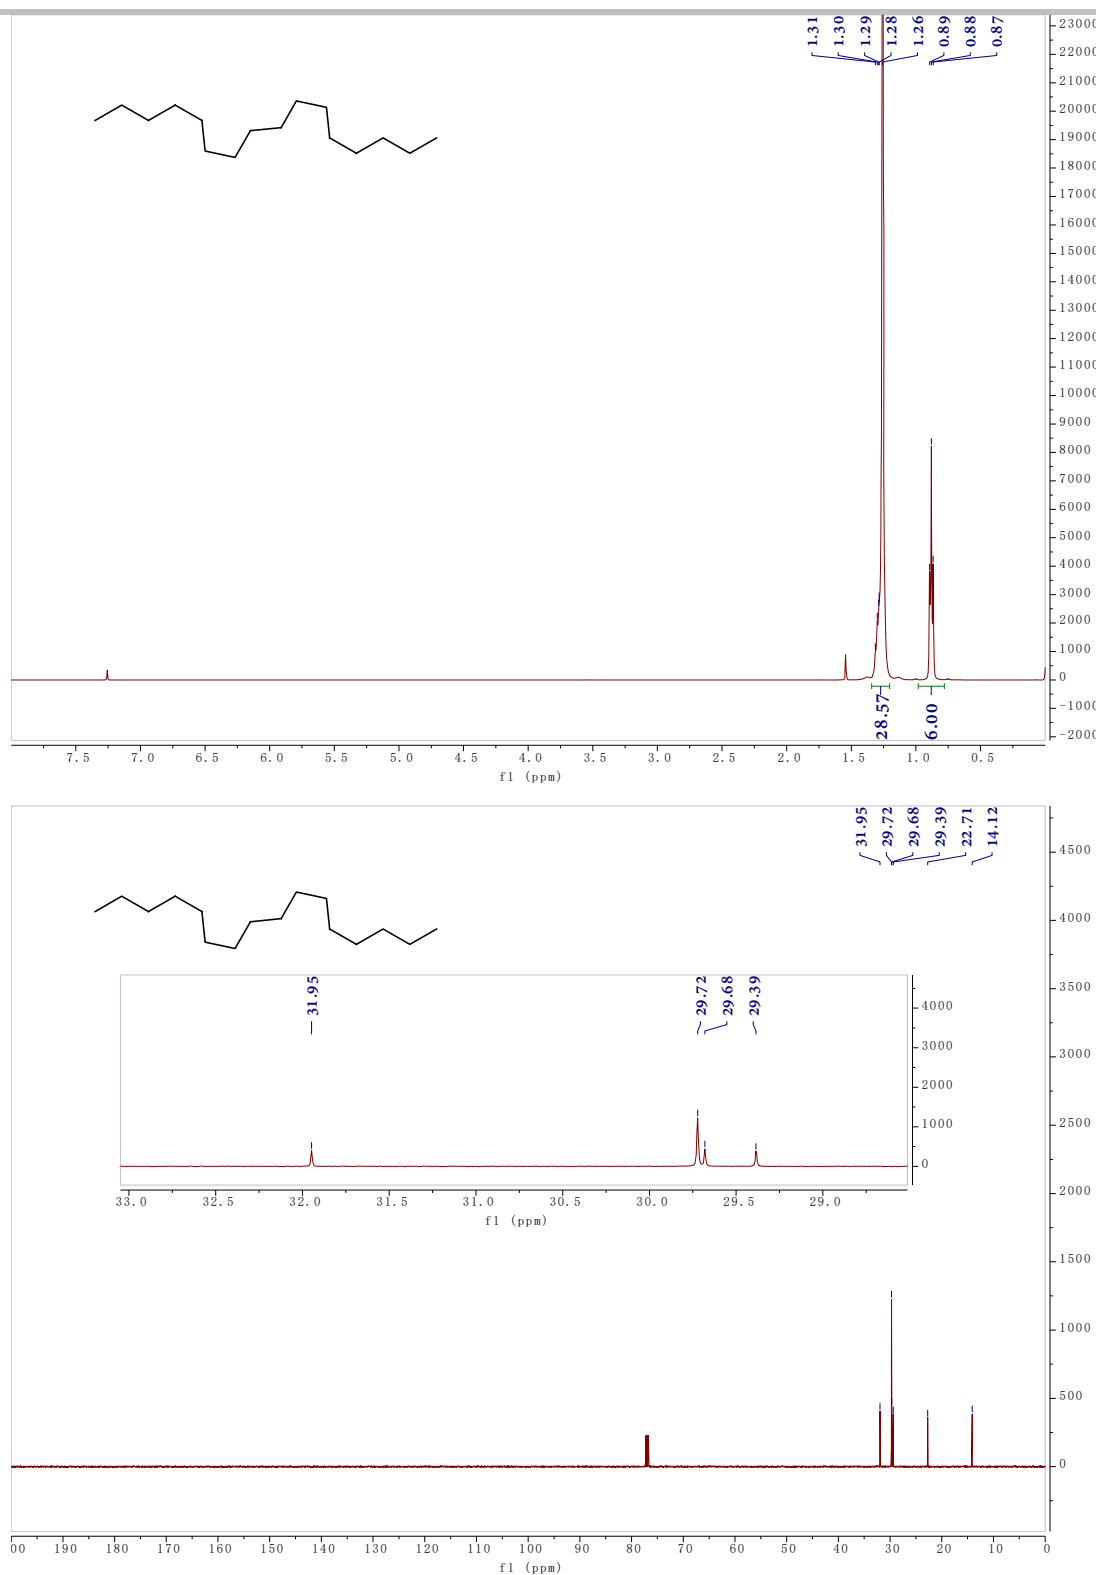**Figure S20.** <sup>1</sup>H and <sup>13</sup>C-NMR spectra of DF3

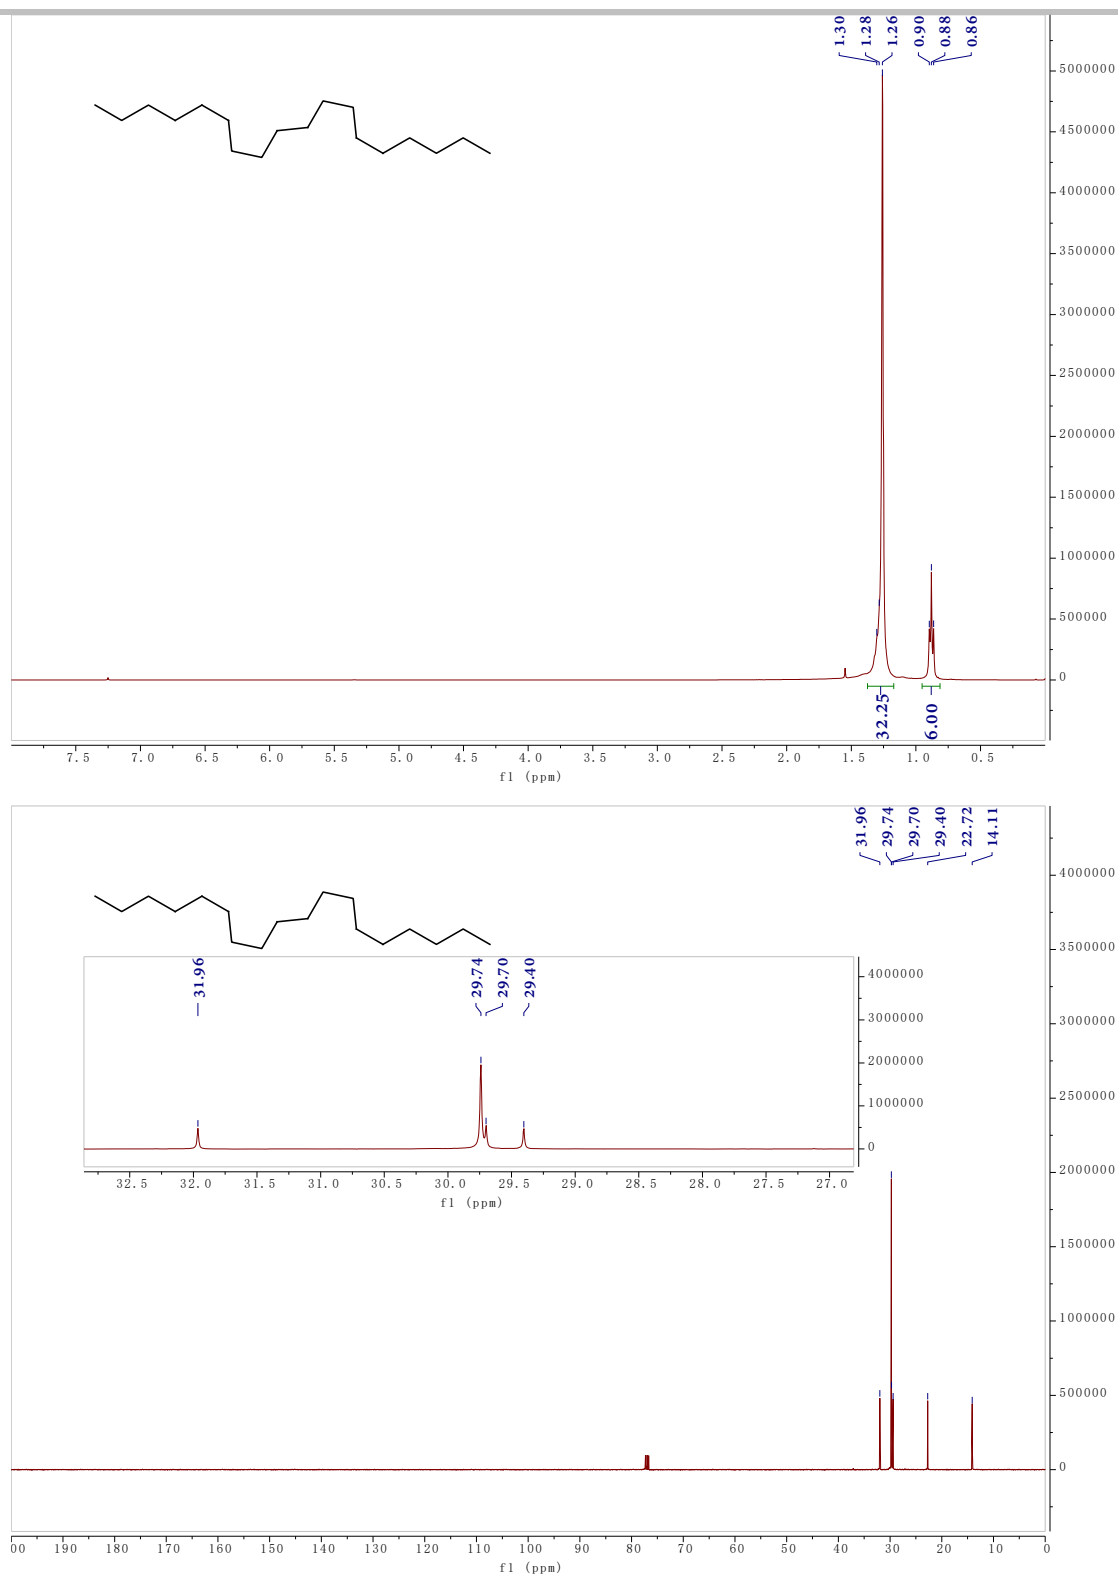

Figure S21.  $^1\text{H}$  and  $^{13}\text{C}$ -NMR spectra of DF4

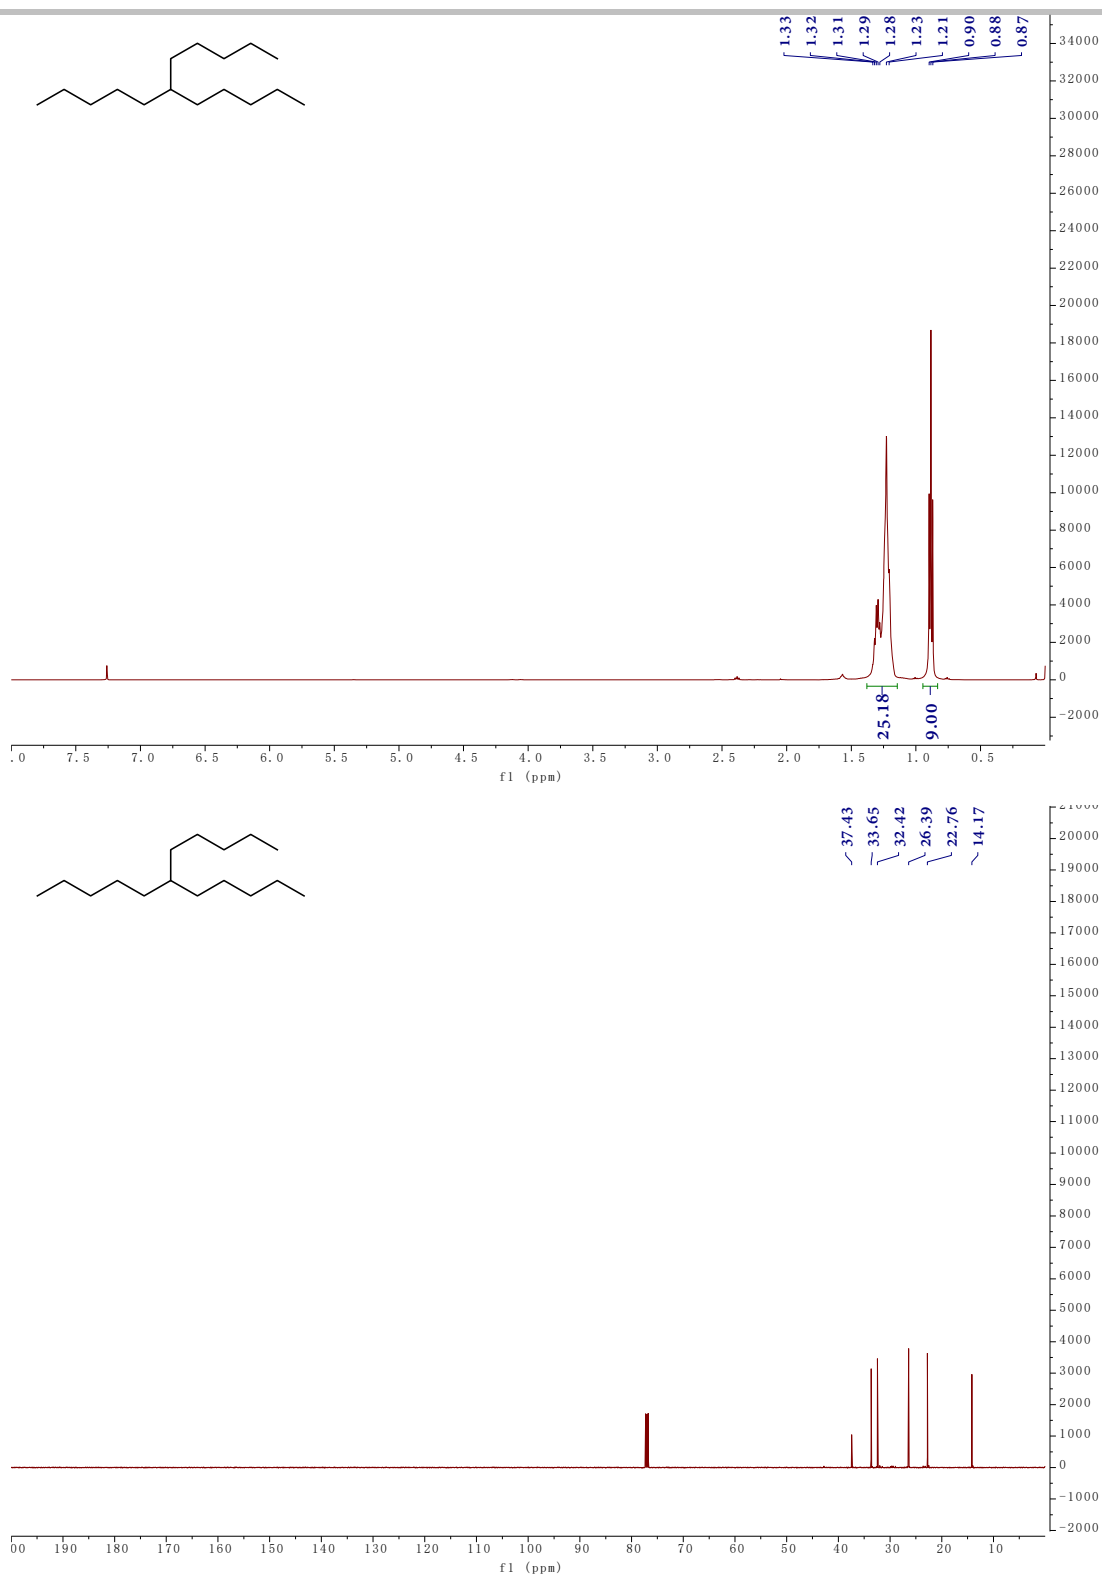**Figure S22.** <sup>1</sup>H and <sup>13</sup>C-NMR spectra of DF5/6

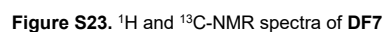

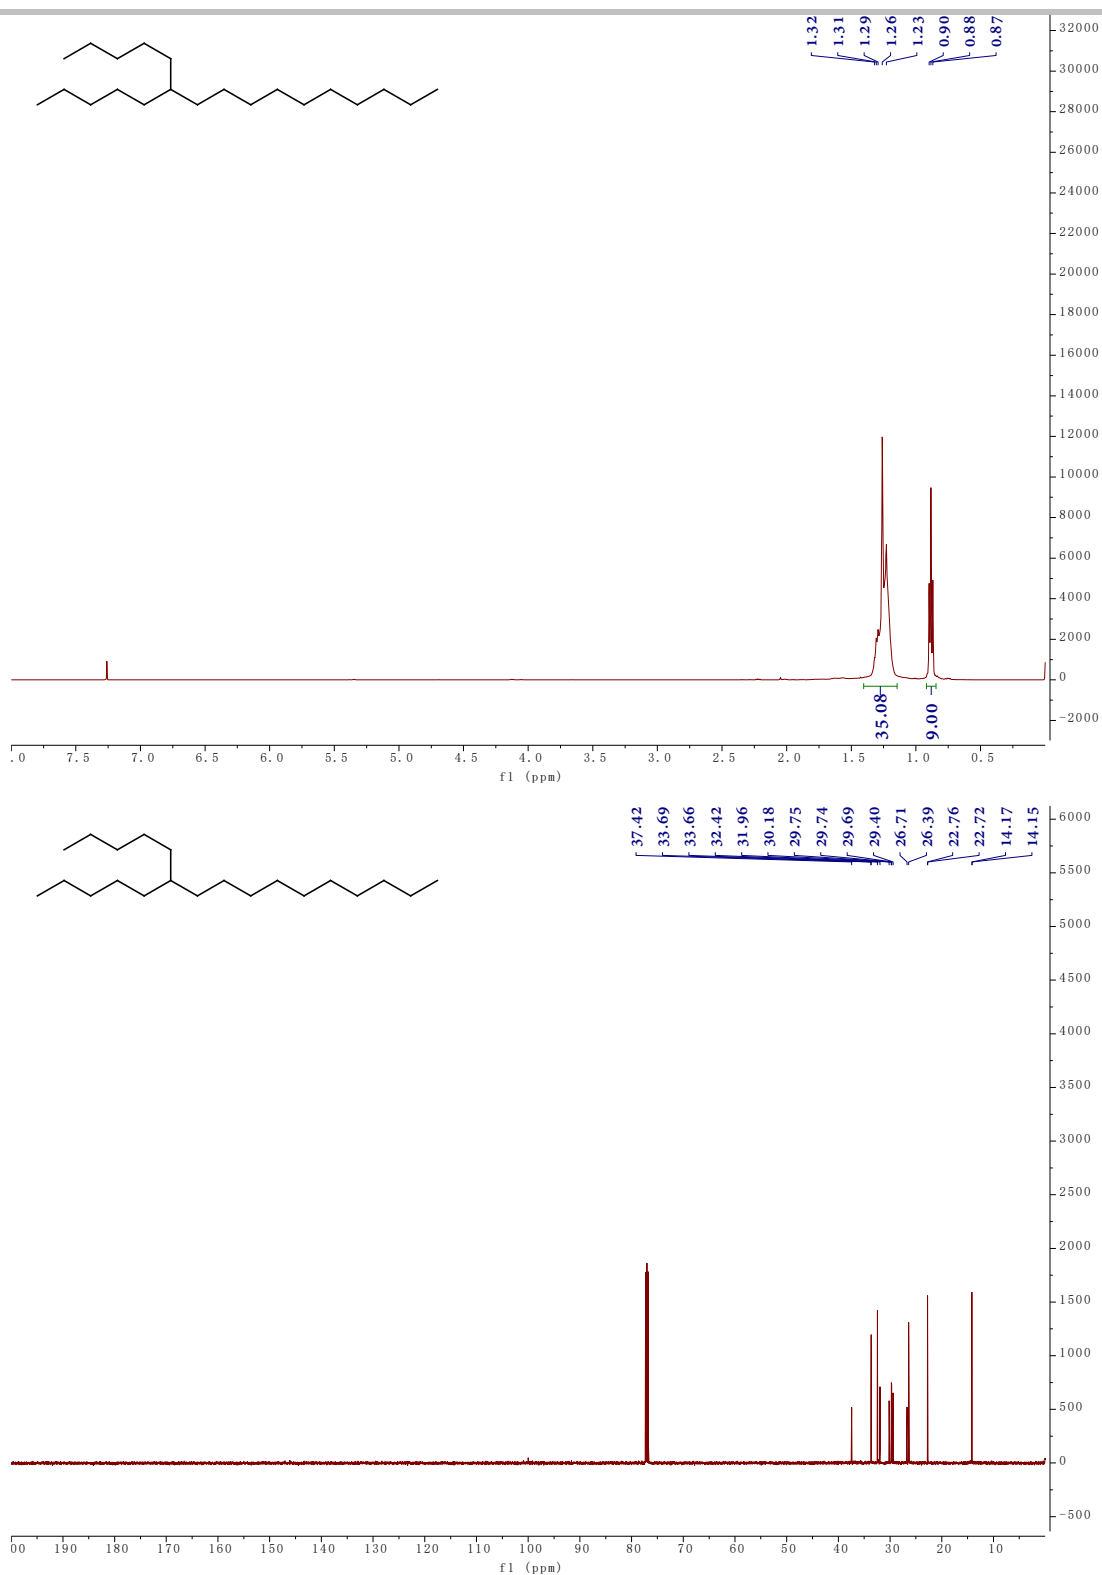

Figure S24.  $^1\text{H}$  and  $^{13}\text{C}$ -NMR spectra of DF8

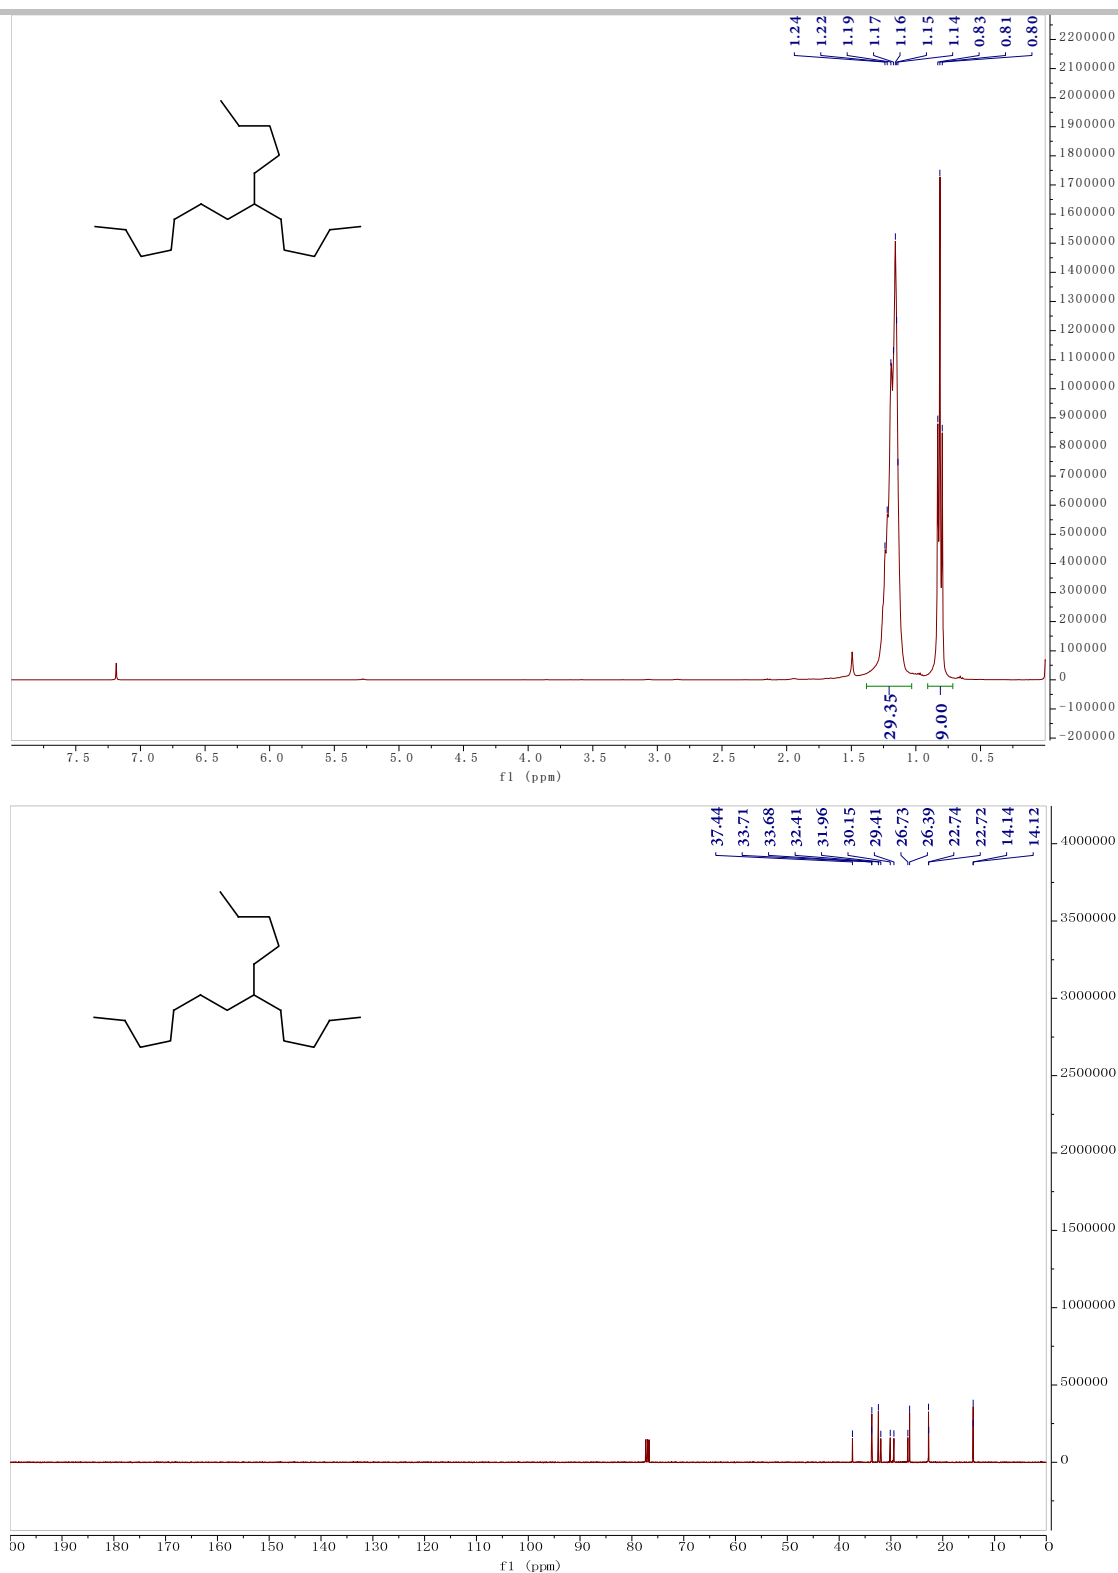

Figure S25.  $^1\text{H}$  and  $^{13}\text{C}$ -NMR spectra of DF9

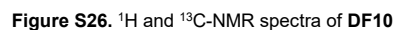

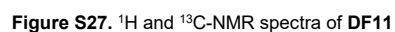

## 6. References

- [1]. Akiyama, G.; Matsuda, R.; Sato, H.; Takata, M.; Kitagawa, S., *Adv. Mater.* **2011**, 23 (29), 3294-3297.
- [2]. Hong, D.-Y.; Hwang, Y. K.; Serre, C.; Férey, G.; Chang, J.-S., *Adv. Funct. Mater.* **2009**, 19 (10), 1537-1552.
- [3]. Lin Foo, M.; Horike, S.; Fukushima, T.; Hijikata, Y.; Kubota, Y.; Takata, M.; Kitagawa, S., *Dalton Trans.* **2012**, 41 (45), 13791-4.
- [4]. Zheng, A.; Liu, S.-B.; Deng, F., 31P NMR Chemical Shifts of Phosphorus Probes as Reliable and Practical Acidity Scales for Solid and Liquid Catalysts. *Chem. Rev.* **2017**, 117 (19), 12475-12531.
- [5]. Yi, X.; Ko, H.-H.; Deng, F.; Liu, S.-B.; Zheng, A., Solid-state 31P NMR mapping of active centers and relevant spatial correlations in solid acid catalysts. *Nat. Protoc.* **2020**, 15 (10), 3527-3555.
- [6]. Li, N.-N.; Zhang, Y.-L.; Mao, S.; Gao, Y.-R.; Guo, D.-D.; Wang, Y.-Q., *Org. Lett.* **2014**, 16 (10), 2732-2735.
- [7]. Liu, D.-H.; Marks, T. J.; Li, Z., *ChemSusChem* **2019**, 12 (24), 5217-5223.

## Author Contributions

Z.L. and Y.B.Z. conceived and designed the experiments; D.H.L. performed the catalytic experiments; H.L.H. performed the MOF synthesis and characterization; J.J.W., S.Y.Z., T.Z., X.Y.G. contributed the material synthesis. Y.X., X.Y., and A.Z. contributed the NMR spectroscopy. D.H.L. and H.L.H. wrote the manuscript together with input from all authors. \*Corresponding authors: Y.B.Z. zhangyb@shanghaitech.edu.cn or Z.L. lizhi@shanghaitech.edu.cn. †These authors contributed equally.
